# Supplementary material for: Predicting protein function by machine learning on amino acid sequences – a critical evaluation
Source: PubMed Central journal article supplement (PMC1847686; doi:10.1186/1471-2164-8-78), 2007-03-20
Supplement: 1471-2164-8-78-S1.pdf [file 1471-2164-8-78-S1.pdf]

# Amino Acid Sequence Features Used for Predicting Protein Function by Machine Learning

April 28, 2005

| 1   | 2 | 3 | 4 | 5 | 6 | 7 | 8 | 9 | 10 | 11 | 12 | 13 |
|-----|---|---|---|---|---|---|---|---|----|----|----|----|
| Ala | - | X | X | - | - | X | - | - | -  | -  | -  | -  |
| Cys | - | X | X | - | - | - | - | - | -  | -  | -  | -  |
| Asp | X | - | - | - | - | - | - | X | -  | X  | X  | -  |
| Glu | X | - | - | - | - | - | - | X | -  | X  | X  | -  |
| Phe | - | X | X | - | X | - | - | - | -  | -  | -  | -  |
| Gly | - | X | X | - | - | X | - | - | -  | -  | -  | -  |
| His | - | X | - | - | X | - | - | X | X  | -  | X  | -  |
| Lys | X | - | X | - | - | - | - | X | X  | -  | X  | -  |
| Ile | - | X | X | X | - | - | - | - | -  | -  | -  | -  |
| Leu | - | X | X | X | - | - | - | - | -  | -  | -  | -  |
| Met | - | X | X | - | - | - | X | - | -  | -  | -  | -  |
| Asn | X | - | - | - | - | - | X | - | -  | -  | X  | X  |
| Pro | X | - | - | - | - | - | X | - | -  | -  | -  | -  |
| Gln | X | - | - | - | - | - | X | - | -  | -  | X  | X  |
| Arg | X | - | - | - | - | - | - | X | X  | -  | X  | -  |
| Ser | X | - | X | - | - | X | - | - | -  | -  | X  | -  |
| Thr | - | X | - | - | - | - | X | - | -  | -  | X  | -  |
| Val | - | X | X | X | - | - | - | - | -  | -  | -  | -  |
| Trp | - | X | X | - | X | - | - | - | -  | -  | X  | -  |
| Tyr | - | X | - | - | X | - | - | - | -  | -  | X  | -  |

Table 1: Definition of amino acid sets used in the description of sequence features. 1 = Amino Acids, 2 = Hydrophilic, 3 = Hydrophobic, 4 = Large Hydrophobic, 5 = Aliphatic, 6 = Aromatic, 7 = Tiny, 8 = Diverse, 9 = Charged, 10 = Positive, 11 = Negative, 12 = Polar, 13 = Amides.

1. The protein length
2. The molecular weight of the protein
3. The isoelectric point of the protein
4. The aliphatic index of the protein
5. The Grand Average of Hydropathicity (GRAVY) of the protein

6. The total number of hydrophilic residues in the sequence
7. The total number of hydrophilic residues divided by the length of the protein
8. The total number of hydrophilic residues in the first quarter of the sequence
9. The total number of hydrophilic residues in the second quarter of the sequence
10. The total number of hydrophilic residues in the third quarter of the sequence
11. The total number of hydrophilic residues in the fourth quarter of the sequence
12. The total number of hydrophilic residues in the first quarter of the sequence divided by the length of the protein
13. The total number of hydrophilic residues in the second quarter of the sequence divided by the length of the protein
14. The total number of hydrophilic residues in the third quarter of the sequence divided by the length of the protein
15. The total number of hydrophilic residues in the fourth quarter of the sequence divided by the length of the protein
16. The total number of hydrophilic residues in the first quarter of the sequence divided by the total number of hydrophilic blocks
17. The total number of hydrophilic residues in the first quarter of the sequence divided by the total number of hydrophilic blocks
18. The total number of hydrophilic residues in the first quarter of the sequence divided by the total number of hydrophilic blocks
19. The total number of hydrophilic residues in the first quarter of the sequence divided by the total number of hydrophilic blocks
20. The total number of hydrophilic residues in the first half of the protein
21. The total number of hydrophilic residues in the three-quarter region of the protein
22. The total number of hydrophilic residues from position 25% to 75% of the protein
23. The total number of hydrophilic residues in the second half of the protein
24. The total number of hydrophilic residues in the first half of the protein divided by the protein length
25. The total number of hydrophilic residues in the three-quarter region of the protein divided by the protein length

26. The total number of hydrophilic residues from position 25% to 75% of the protein divided by the protein length
27. The total number of hydrophilic residues in the second half of the protein divided by the protein length
28. The total number of hydrophilic residues in the first half of the protein divided by the total number of hydrophilic residues in the protein
29. The total number of hydrophilic residues in the three-quarter region of the protein divided by the total number of hydrophilic residues in the protein
30. The total number of hydrophilic residues from position 25% to 75% of the protein divided by the total number of hydrophilic residues in the protein
31. The total number of hydrophilic residues in the second half of the protein divided by the total number of hydrophilic residues in the protein
32. The total number of hydrophilic residue blocks in the protein
33. The total number of hydrophilic residue blocks in the first quarter of the protein
34. The total number of hydrophilic residue blocks in the second quarter of the protein
35. The total number of hydrophilic residue blocks in the third quarter of the protein
36. The total number of hydrophilic residue blocks in the fourth quarter of the protein
37. The total number of hydrophilic residue blocks in the first quarter of the protein divided by the protein length
38. The total number of hydrophilic residue blocks in the second quarter of the protein divided by the protein length
39. The total number of hydrophilic residue blocks in the third quarter of the protein divided by the protein length
40. The total number of hydrophilic residue blocks in the fourth quarter of the protein divided by the protein length
41. The total number of hydrophilic residue blocks in the first quarter of the protein divided by the total number of hydrophilic blocks of the protein
42. The total number of hydrophilic residue blocks in the second quarter of the protein divided by the total number of hydrophilic blocks of the protein
43. The total number of hydrophilic residue blocks in the third quarter of the protein divided by the total number of hydrophilic blocks of the protein
44. The total number of hydrophilic residue blocks in the fourth quarter of the protein divided by the total number of hydrophilic blocks of the protein

45. The total number of hydrophilic residue blocks in the first half of the protein
46. The total number of hydrophilic residue blocks in the three-quarter region of the protein
47. The total number of hydrophilic residue blocks from position 25% to 75% of the protein
48. The total number of hydrophilic residue blocks in the second half of the protein
49. The total number of hydrophilic residue blocks in the first half of the protein divided by the protein length
50. The total number of hydrophilic residue blocks in the three-quarter region of the protein divided by the protein length
51. The total number of hydrophilic residue blocks from position 25% to 75% of the protein divided by the protein length
52. The total number of hydrophilic residue blocks in the second half of the protein divided by the protein length
53. The total number of hydrophilic residue blocks in the first half of the protein divided by the total number of hydrophilic blocks of the protein
54. The total number of hydrophilic residue blocks in the three-quarter region of the protein divided by the total number of hydrophilic blocks of the protein
55. The total number of hydrophilic residue blocks from position 25% to 75% of the protein divided by the total number of hydrophilic blocks of the protein
56. The total number of hydrophilic residue blocks in the second half of the protein divided by the total number of hydrophilic blocks of the protein
57. The length of the maximum hydrophilic block in the first quarter of the protein
58. The median of the hydrophilic blocks in the first quarter of the protein
59. The mean of the hydrophilic blocks in the first quarter of the protein
60. The length of the maximum hydrophilic block in the second quarter of the protein
61. The median of the hydrophilic blocks in the second quarter of the protein
62. The mean of the hydrophilic blocks in the second quarter of the protein
63. The length of the maximum hydrophilic block in the third quarter of the protein
64. The median of the hydrophilic blocks in the third quarter of the protein

65. The mean of the hydrophilic blocks in the third quarter of the protein
66. The length of the maximum hydrophilic block in the fourth quarter of the protein
67. The median of the hydrophilic blocks in the fourth quarter of the protein
68. The mean of the hydrophilic blocks in the fourth quarter of the protein
69. The length of the maximum hydrophilic block of the protein
70. The median of the hydrophilic blocks of the protein
71. The mean of the hydrophilic blocks of the protein
72. The total number of hydrophobic residues in the sequence
73. The total number of hydrophobic residues divided by the length of the protein
74. The total number of hydrophobic residues in the first quarter of the sequence
75. The total number of hydrophobic residues in the second quarter of the sequence
76. The total number of hydrophobic residues in the third quarter of the sequence
77. The total number of hydrophobic residues in the fourth quarter of the sequence
78. The total number of hydrophobic residues in the first quarter of the sequence divided by the length of the protein
79. The total number of hydrophobic residues in the second quarter of the sequence divided by the length of the protein
80. The total number of hydrophobic residues in the third quarter of the sequence divided by the length of the protein
81. The total number of hydrophobic residues in the fourth quarter of the sequence divided by the length of the protein
82. The total number of hydrophobic residues in the first quarter of the sequence divided by the total number of hydrophobic blocks
83. The total number of hydrophobic residues in the first quarter of the sequence divided by the total number of hydrophobic blocks
84. The total number of hydrophobic residues in the first quarter of the sequence divided by the total number of hydrophobic blocks
85. The total number of hydrophobic residues in the first quarter of the sequence divided by the total number of hydrophobic blocks
86. The total number of hydrophobic residues in the first half of the protein

87. The total number of hydrophobic residues in the three-quarter region of the protein
88. The total number of hydrophobic residues from position 25% to 75% of the protein
89. The total number of hydrophobic residues in the second half of the protein
90. The total number of hydrophobic residues in the first half of the protein divided by the protein length
91. The total number of hydrophobic residues in the three-quarter region of the protein divided by the protein length
92. The total number of hydrophobic residues from position 25% to 75% of the protein divided by the protein length
93. The total number of hydrophobic residues in the second half of the protein divided by the protein length
94. The total number of hydrophobic residues in the first half of the protein divided by the total number of hydrophobic residues in the protein
95. The total number of hydrophobic residues in the three-quarter region of the protein divided by the total number of hydrophobic residues in the protein
96. The total number of hydrophobic residues from position 25% to 75% of the protein divided by the total number of hydrophobic residues in the protein
97. The total number of hydrophobic residues in the second half of the protein divided by the total number of hydrophobic residues in the protein
98. The total number of hydrophobic residue blocks in the protein
99. The total number of hydrophobic residue blocks in the first quarter of the protein
100. The total number of hydrophobic residue blocks in the second quarter of the protein
101. The total number of hydrophobic residue blocks in the third quarter of the protein
102. The total number of hydrophobic residue blocks in the fourth quarter of the protein
103. The total number of hydrophobic residue blocks in the first quarter of the protein divided by the protein length
104. The total number of hydrophobic residue blocks in the second quarter of the protein divided by the protein length
105. The total number of hydrophobic residue blocks in the third quarter of the protein divided by the protein length

106. The total number of hydrophobic residue blocks in the fourth quarter of the protein divided by the protein length
107. The total number of hydrophobic residue blocks in the first quarter of the protein divided by the total number of hydrophobic blocks of the protein
108. The total number of hydrophobic residue blocks in the second quarter of the protein divided by the total number of hydrophobic blocks of the protein
109. The total number of hydrophobic residue blocks in the third quarter of the protein divided by the total number of hydrophobic blocks of the protein
110. The total number of hydrophobic residue blocks in the fourth quarter of the protein divided by the total number of hydrophobic blocks of the protein
111. The total number of hydrophobic residue blocks in the first half of the protein
112. The total number of hydrophobic residue blocks in the three-quarter region of the protein
113. The total number of hydrophobic residue blocks from position 25% to 75% of the protein
114. The total number of hydrophobic residue blocks in the second half of the protein
115. The total number of hydrophobic residue blocks in the first half of the protein divided by the protein length
116. The total number of hydrophobic residue blocks in the three-quarter region of the protein divided by the protein length
117. The total number of hydrophobic residue blocks from position 25% to 75% of the protein divided by the protein length
118. The total number of hydrophobic residue blocks in the second half of the protein divided by the protein length
119. The total number of hydrophobic residue blocks in the first half of the protein divided by the total number of hydrophobic blocks of the protein
120. The total number of hydrophobic residue blocks in the three-quarter region of the protein divided by the total number of hydrophobic blocks of the protein
121. The total number of hydrophobic residue blocks from position 25% to 75% of the protein divided by the total number of hydrophobic blocks of the protein
122. The total number of hydrophobic residue blocks in the second half of the protein divided by the total number of hydrophobic blocks of the protein

123. The length of the maximum hydrophobic block in the first quarter of the protein
124. The median of the hydrophobic blocks in the first quarter of the protein
125. The mean of the hydrophobic blocks in the first quarter of the protein
126. The length of the maximum hydrophobic block in the second quarter of the protein
127. The median of the hydrophobic blocks in the second quarter of the protein
128. The mean of the hydrophobic blocks in the second quarter of the protein
129. The length of the maximum hydrophobic block in the third quarter of the protein
130. The median of the hydrophobic blocks in the third quarter of the protein
131. The mean of the hydrophobic blocks in the third quarter of the protein
132. The length of the maximum hydrophobic block in the fourth quarter of the protein
133. The median of the hydrophobic blocks in the fourth quarter of the protein
134. The mean of the hydrophobic blocks in the fourth quarter of the protein
135. The length of the maximum hydrophobic block of the protein
136. The median of the hydrophobic blocks of the protein
137. The mean of the hydrophobic blocks of the protein
138. The total number of large hydrophobic residues in the sequence
139. The total number of large hydrophobic residues divided by the length of the protein
140. The total number of large hydrophobic residues in the first quarter of the sequence
141. The total number of large hydrophobic residues in the second quarter of the sequence
142. The total number of large hydrophobic residues in the third quarter of the sequence
143. The total number of large hydrophobic residues in the fourth quarter of the sequence
144. The total number of large hydrophobic residues in the first quarter of the sequence divided by the length of the protein
145. The total number of large hydrophobic residues in the second quarter of the sequence divided by the length of the protein



146. The total number of large hydrophobic residues in the third quarter of the sequence divided by the length of the protein
147. The total number of large hydrophobic residues in the fourth quarter of the sequence divided by the length of the protein
148. The total number of large hydrophobic residues in the first quarter of the sequence divided by the total number of large hydrophobic blocks
149. The total number of large hydrophobic residues in the first quarter of the sequence divided by the total number of large hydrophobic blocks
150. The total number of large hydrophobic residues in the first quarter of the sequence divided by the total number of large hydrophobic blocks
151. The total number of large hydrophobic residues in the first quarter of the sequence divided by the total number of large hydrophobic blocks
152. The total number of large hydrophobic residues in the first half of the protein
153. The total number of large hydrophobic residues in the three-quarter region of the protein
154. The total number of large hydrophobic residues from position 25% to 75% of the protein
155. The total number of large hydrophobic residues in the second half of the protein
156. The total number of large hydrophobic residues in the first half of the protein divided by the protein length
157. The total number of large hydrophobic residues in the three-quarter region of the protein divided by the protein length
158. The total number of large hydrophobic residues from position 25% to 75% of the protein divided by the protein length
159. The total number of large hydrophobic residues in the second half of the protein divided by the protein length
160. The total number of large hydrophobic residues in the first half of the protein divided by the total number of large hydrophobic residues in the protein
161. The total number of large hydrophobic residues in the three-quarter region of the protein divided by the total number of large hydrophobic residues in the protein
162. The total number of large hydrophobic residues from position 25% to 75% of the protein divided by the total number of large hydrophobic residues in the protein

163. The total number of large hydrophobic residues in the second half of the protein divided by the total number of large hydrophobic residues in the protein
164. The total number of large hydrophobic residue blocks in the protein
165. The total number of large hydrophobic residue blocks in the first quarter of the protein
166. The total number of large hydrophobic residue blocks in the second quarter of the protein
167. The total number of large hydrophobic residue blocks in the third quarter of the protein
168. The total number of large hydrophobic residue blocks in the fourth quarter of the protein
169. The total number of large hydrophobic residue blocks in the first quarter of the protein divided by the protein length
170. The total number of large hydrophobic residue blocks in the second quarter of the protein divided by the protein length
171. The total number of large hydrophobic residue blocks in the third quarter of the protein divided by the protein length
172. The total number of large hydrophobic residue blocks in the fourth quarter of the protein divided by the protein length
173. The total number of large hydrophobic residue blocks in the first quarter of the protein divided by the total number of large hydrophobic blocks of the protein
174. The total number of large hydrophobic residue blocks in the second quarter of the protein divided by the total number of large hydrophobic blocks of the protein
175. The total number of large hydrophobic residue blocks in the third quarter of the protein divided by the total number of large hydrophobic blocks of the protein
176. The total number of large hydrophobic residue blocks in the fourth quarter of the protein divided by the total number of large hydrophobic blocks of the protein
177. The total number of large hydrophobic residue blocks in the first half of the protein
178. The total number of large hydrophobic residue blocks in the three-quarter region of the protein
179. The total number of large hydrophobic residue blocks from position 25% to 75% of the protein

180. The total number of large hydrophobic residue blocks in the second half of the protein
181. The total number of large hydrophobic residue blocks in the first half of the protein divided by the protein length
182. The total number of large hydrophobic residue blocks in the three-quarter region of the protein divided by the protein length
183. The total number of large hydrophobic residue blocks from position 25% to 75% of the protein divided by the protein length
184. The total number of large hydrophobic residue blocks in the second half of the protein divided by the protein length
185. The total number of large hydrophobic residue blocks in the first half of the protein divided by the total number of large hydrophobic blocks of the protein
186. The total number of large hydrophobic residue blocks in the three-quarter region of the protein divided by the total number of large hydrophobic blocks of the protein
187. The total number of large hydrophobic residue blocks from position 25% to 75% of the protein divided by the total number of large hydrophobic blocks of the protein
188. The total number of large hydrophobic residue blocks in the second half of the protein divided by the total number of large hydrophobic blocks of the protein
189. The length of the maximum large hydrophobic block in the first quarter of the protein
190. The median of the large hydrophobic blocks in the first quarter of the protein
191. The mean of the large hydrophobic blocks in the first quarter of the protein
192. The length of the maximum large hydrophobic block in the second quarter of the protein
193. The median of the large hydrophobic blocks in the second quarter of the protein
194. The mean of the large hydrophobic blocks in the second quarter of the protein
195. The length of the maximum large hydrophobic block in the third quarter of the protein
196. The median of the large hydrophobic blocks in the third quarter of the protein
197. The mean of the large hydrophobic blocks in the third quarter of the protein

198. The length of the maximum large hydrophobic block in the fourth quarter of the protein
199. The median of the large hydrophobic blocks in the fourth quarter of the protein
200. The mean of the large hydrophobic blocks in the fourth quarter of the protein
201. The length of the maximum large hydrophobic block of the protein
202. The median of the large hydrophobic blocks of the protein
203. The mean of the large hydrophobic blocks of the protein
204. The total number of aliphatic residues in the sequence
205. The total number of aliphatic residues divided by the length of the protein
206. The total number of aliphatic residues in the first quarter of the sequence
207. The total number of aliphatic residues in the second quarter of the sequence
208. The total number of aliphatic residues in the third quarter of the sequence
209. The total number of aliphatic residues in the fourth quarter of the sequence
210. The total number of aliphatic residues in the first quarter of the sequence divided by the length of the protein
211. The total number of aliphatic residues in the second quarter of the sequence divided by the length of the protein
212. The total number of aliphatic residues in the third quarter of the sequence divided by the length of the protein
213. The total number of aliphatic residues in the fourth quarter of the sequence divided by the length of the protein
214. The total number of aliphatic residues in the first quarter of the sequence divided by the total number of aliphatic blocks
215. The total number of aliphatic residues in the first quarter of the sequence divided by the total number of aliphatic blocks
216. The total number of aliphatic residues in the first quarter of the sequence divided by the total number of aliphatic blocks
217. The total number of aliphatic residues in the first quarter of the sequence divided by the total number of aliphatic blocks
218. The total number of aliphatic residues in the first half of the protein
219. The total number of aliphatic residues in the three-quarter region of the protein

220. The total number of aliphatic residues from position 25% to 75% of the protein
221. The total number of aliphatic residues in the second half of the protein
222. The total number of aliphatic residues in the first half of the protein divided by the protein length
223. The total number of aliphatic residues in the three-quarter region of the protein divided by the protein length
224. The total number of aliphatic residues from position 25% to 75% of the protein divided by the protein length
225. The total number of aliphatic residues in the second half of the protein divided by the protein length
226. The total number of aliphatic residues in the first half of the protein divided by the total number of aliphatic residues in the protein
227. The total number of aliphatic residues in the three-quarter region of the protein divided by the total number of aliphatic residues in the protein
228. The total number of aliphatic residues from position 25% to 75% of the protein divided by the total number of aliphatic residues in the protein
229. The total number of aliphatic residues in the second half of the protein divided by the total number of aliphatic residues in the protein
230. The total number of aliphatic residue blocks in the protein
231. The total number of aliphatic residue blocks in the first quarter of the protein
232. The total number of aliphatic residue blocks in the second quarter of the protein
233. The total number of aliphatic residue blocks in the third quarter of the protein
234. The total number of aliphatic residue blocks in the fourth quarter of the protein
235. The total number of aliphatic residue blocks in the first quarter of the protein divided by the protein length
236. The total number of aliphatic residue blocks in the second quarter of the protein divided by the protein length
237. The total number of aliphatic residue blocks in the third quarter of the protein divided by the protein length
238. The total number of aliphatic residue blocks in the fourth quarter of the protein divided by the protein length
239. The total number of aliphatic residue blocks in the first quarter of the protein divided by the total number of aliphatic blocks of the protein

240. The total number of aliphatic residue blocks in the second quarter of the protein divided by the total number of aliphatic blocks of the protein
241. The total number of aliphatic residue blocks in the third quarter of the protein divided by the total number of aliphatic blocks of the protein
242. The total number of aliphatic residue blocks in the fourth quarter of the protein divided by the total number of aliphatic blocks of the protein
243. The total number of aliphatic residue blocks in the first half of the protein
244. The total number of aliphatic residue blocks in the three-quarter region of the protein
245. The total number of aliphatic residue blocks from position 25% to 75% of the protein
246. The total number of aliphatic residue blocks in the second half of the protein
247. The total number of aliphatic residue blocks in the first half of the protein divided by the protein length
248. The total number of aliphatic residue blocks in the three-quarter region of the protein divided by the protein length
249. The total number of aliphatic residue blocks from position 25% to 75% of the protein divided by the protein length
250. The total number of aliphatic residue blocks in the second half of the protein divided by the protein length
251. The total number of aliphatic residue blocks in the first half of the protein divided by the total number of aliphatic blocks of the protein
252. The total number of aliphatic residue blocks in the three-quarter region of the protein divided by the total number of aliphatic blocks of the protein
253. The total number of aliphatic residue blocks from position 25% to 75% of the protein divided by the total number of aliphatic blocks of the protein
254. The total number of aliphatic residue blocks in the second half of the protein divided by the total number of aliphatic blocks of the protein
255. The length of the maximum aliphatic block in the first quarter of the protein
256. The median of the aliphatic blocks in the first quarter of the protein
257. The mean of the aliphatic blocks in the first quarter of the protein
258. The length of the maximum aliphatic block in the second quarter of the protein
259. The median of the aliphatic blocks in the second quarter of the protein
260. The mean of the aliphatic blocks in the second quarter of the protein

261. The length of the maximum aliphatic block in the third quarter of the protein
262. The median of the aliphatic blocks in the third quarter of the protein
263. The mean of the aliphatic blocks in the third quarter of the protein
264. The length of the maximum aliphatic block in the fourth quarter of the protein
265. The median of the aliphatic blocks in the fourth quarter of the protein
266. The mean of the aliphatic blocks in the fourth quarter of the protein
267. The length of the maximum aliphatic block of the protein
268. The median of the aliphatic blocks of the protein
269. The mean of the aliphatic blocks of the protein
270. The total number of aromatic residues in the sequence
271. The total number of aromatic residues divided by the length of the protein
272. The total number of aromatic residues in the first quarter of the sequence
273. The total number of aromatic residues in the second quarter of the sequence
274. The total number of aromatic residues in the third quarter of the sequence
275. The total number of aromatic residues in the fourth quarter of the sequence
276. The total number of aromatic residues in the first quarter of the sequence divided by the length of the protein
277. The total number of aromatic residues in the second quarter of the sequence divided by the length of the protein
278. The total number of aromatic residues in the third quarter of the sequence divided by the length of the protein
279. The total number of aromatic residues in the fourth quarter of the sequence divided by the length of the protein
280. The total number of aromatic residues in the first quarter of the sequence divided by the total number of aromatic blocks
281. The total number of aromatic residues in the first quarter of the sequence divided by the total number of aromatic blocks
282. The total number of aromatic residues in the first quarter of the sequence divided by the total number of aromatic blocks
283. The total number of aromatic residues in the first quarter of the sequence divided by the total number of aromatic blocks
284. The total number of aromatic residues in the first half of the protein

285. The total number of aromatic residues in the three-quarter region of the protein
286. The total number of aromatic residues from position 25% to 75% of the protein
287. The total number of aromatic residues in the second half of the protein
288. The total number of aromatic residues in the first half of the protein divided by the protein length
289. The total number of aromatic residues in the three-quarter region of the protein divided by the protein length
290. The total number of aromatic residues from position 25% to 75% of the protein divided by the protein length
291. The total number of aromatic residues in the second half of the protein divided by the protein length
292. The total number of aromatic residues in the first half of the protein divided by the total number of aromatic residues in the protein
293. The total number of aromatic residues in the three-quarter region of the protein divided by the total number of aromatic residues in the protein
294. The total number of aromatic residues from position 25% to 75% of the protein divided by the total number of aromatic residues in the protein
295. The total number of aromatic residues in the second half of the protein divided by the total number of aromatic residues in the protein
296. The total number of aromatic residue blocks in the protein
297. The total number of aromatic residue blocks in the first quarter of the protein
298. The total number of aromatic residue blocks in the second quarter of the protein
299. The total number of aromatic residue blocks in the third quarter of the protein
300. The total number of aromatic residue blocks in the fourth quarter of the protein
301. The total number of aromatic residue blocks in the first quarter of the protein divided by the protein length
302. The total number of aromatic residue blocks in the second quarter of the protein divided by the protein length
303. The total number of aromatic residue blocks in the third quarter of the protein divided by the protein length
304. The total number of aromatic residue blocks in the fourth quarter of the protein divided by the protein length



305. The total number of aromatic residue blocks in the first quarter of the protein divided by the total number of aromatic blocks of the protein
306. The total number of aromatic residue blocks in the second quarter of the protein divided by the total number of aromatic blocks of the protein
307. The total number of aromatic residue blocks in the third quarter of the protein divided by the total number of aromatic blocks of the protein
308. The total number of aromatic residue blocks in the fourth quarter of the protein divided by the total number of aromatic blocks of the protein
309. The total number of aromatic residue blocks in the first half of the protein
310. The total number of aromatic residue blocks in the three-quarter region of the protein
311. The total number of aromatic residue blocks from position 25% to 75% of the protein
312. The total number of aromatic residue blocks in the second half of the protein
313. The total number of aromatic residue blocks in the first half of the protein divided by the protein length
314. The total number of aromatic residue blocks in the three-quarter region of the protein divided by the protein length
315. The total number of aromatic residue blocks from position 25% to 75% of the protein divided by the protein length
316. The total number of aromatic residue blocks in the second half of the protein divided by the protein length
317. The total number of aromatic residue blocks in the first half of the protein divided by the total number of aromatic blocks of the protein
318. The total number of aromatic residue blocks in the three-quarter region of the protein divided by the total number of aromatic blocks of the protein
319. The total number of aromatic residue blocks from position 25% to 75% of the protein divided by the total number of aromatic blocks of the protein
320. The total number of aromatic residue blocks in the second half of the protein divided by the total number of aromatic blocks of the protein
321. The length of the maximum aromatic block in the first quarter of the protein
322. The median of the aromatic blocks in the first quarter of the protein
323. The mean of the aromatic blocks in the first quarter of the protein
324. The length of the maximum aromatic block in the second quarter of the protein

325. The median of the aromatic blocks in the second quarter of the protein
326. The mean of the aromatic blocks in the second quarter of the protein
327. The length of the maximum aromatic block in the third quarter of the protein
328. The median of the aromatic blocks in the third quarter of the protein
329. The mean of the aromatic blocks in the third quarter of the protein
330. The length of the maximum aromatic block in the fourth quarter of the protein
331. The median of the aromatic blocks in the fourth quarter of the protein
332. The mean of the aromatic blocks in the fourth quarter of the protein
333. The length of the maximum aromatic block of the protein
334. The median of the aromatic blocks of the protein
335. The mean of the aromatic blocks of the protein
336. The total number of charged residues in the sequence
337. The total number of charged residues divided by the length of the protein
338. The total number of charged residues in the first quarter of the sequence
339. The total number of charged residues in the second quarter of the sequence
340. The total number of charged residues in the third quarter of the sequence
341. The total number of charged residues in the fourth quarter of the sequence
342. The total number of charged residues in the first quarter of the sequence divided by the length of the protein
343. The total number of charged residues in the second quarter of the sequence divided by the length of the protein
344. The total number of charged residues in the third quarter of the sequence divided by the length of the protein
345. The total number of charged residues in the fourth quarter of the sequence divided by the length of the protein
346. The total number of charged residues in the first quarter of the sequence divided by the total number of charged blocks
347. The total number of charged residues in the first quarter of the sequence divided by the total number of charged blocks
348. The total number of charged residues in the first quarter of the sequence divided by the total number of charged blocks

349. The total number of charged residues in the first quarter of the sequence divided by the total number of charged blocks
350. The total number of charged residues in the first half of the protein
351. The total number of charged residues in the three-quarter region of the protein
352. The total number of charged residues from position 25% to 75% of the protein
353. The total number of charged residues in the second half of the protein
354. The total number of charged residues in the first half of the protein divided by the protein length
355. The total number of charged residues in the three-quarter region of the protein divided by the protein length
356. The total number of charged residues from position 25% to 75% of the protein divided by the protein length
357. The total number of charged residues in the second half of the protein divided by the protein length
358. The total number of charged residues in the first half of the protein divided by the total number of charged residues in the protein
359. The total number of charged residues in the three-quarter region of the protein divided by the total number of charged residues in the protein
360. The total number of charged residues from position 25% to 75% of the protein divided by the total number of charged residues in the protein
361. The total number of charged residues in the second half of the protein divided by the total number of charged residues in the protein
362. The total number of charged residue blocks in the protein
363. The total number of charged residue blocks in the first quarter of the protein
364. The total number of charged residue blocks in the second quarter of the protein
365. The total number of charged residue blocks in the third quarter of the protein
366. The total number of charged residue blocks in the fourth quarter of the protein
367. The total number of charged residue blocks in the first quarter of the protein divided by the protein length
368. The total number of charged residue blocks in the second quarter of the protein divided by the protein length

369. The total number of charged residue blocks in the third quarter of the protein divided by the protein length
370. The total number of charged residue blocks in the fourth quarter of the protein divided by the protein length
371. The total number of charged residue blocks in the first quarter of the protein divided by the total number of charged blocks of the protein
372. The total number of charged residue blocks in the second quarter of the protein divided by the total number of charged blocks of the protein
373. The total number of charged residue blocks in the third quarter of the protein divided by the total number of charged blocks of the protein
374. The total number of charged residue blocks in the fourth quarter of the protein divided by the total number of charged blocks of the protein
375. The total number of charged residue blocks in the first half of the protein
376. The total number of charged residue blocks in the three-quarter region of the protein
377. The total number of charged residue blocks from position 25% to 75% of the protein
378. The total number of charged residue blocks in the second half of the protein
379. The total number of charged residue blocks in the first half of the protein divided by the protein length
380. The total number of charged residue blocks in the three-quarter region of the protein divided by the protein length
381. The total number of charged residue blocks from position 25% to 75% of the protein divided by the protein length
382. The total number of charged residue blocks in the second half of the protein divided by the protein length
383. The total number of charged residue blocks in the first half of the protein divided by the total number of charged blocks of the protein
384. The total number of charged residue blocks in the three-quarter region of the protein divided by the total number of charged blocks of the protein
385. The total number of charged residue blocks from position 25% to 75% of the protein divided by the total number of charged blocks of the protein
386. The total number of charged residue blocks in the second half of the protein divided by the total number of charged blocks of the protein
387. The length of the maximum charged block in the first quarter of the protein
388. The median of the charged blocks in the first quarter of the protein
389. The mean of the charged blocks in the first quarter of the protein

390. The length of the maximum charged block in the second quarter of the protein
391. The median of the charged blocks in the second quarter of the protein
392. The mean of the charged blocks in the second quarter of the protein
393. The length of the maximum charged block in the third quarter of the protein
394. The median of the charged blocks in the third quarter of the protein
395. The mean of the charged blocks in the third quarter of the protein
396. The length of the maximum charged block in the fourth quarter of the protein
397. The median of the charged blocks in the fourth quarter of the protein
398. The mean of the charged blocks in the fourth quarter of the protein
399. The length of the maximum charged block of the protein
400. The median of the charged blocks of the protein
401. The mean of the charged blocks of the protein
402. The total number of tiny residues in the sequence
403. The total number of tiny residues divided by the length of the protein
404. The total number of tiny residues in the first quarter of the sequence
405. The total number of tiny residues in the second quarter of the sequence
406. The total number of tiny residues in the third quarter of the sequence
407. The total number of tiny residues in the fourth quarter of the sequence
408. The total number of tiny residues in the first quarter of the sequence divided by the length of the protein
409. The total number of tiny residues in the second quarter of the sequence divided by the length of the protein
410. The total number of tiny residues in the third quarter of the sequence divided by the length of the protein
411. The total number of tiny residues in the fourth quarter of the sequence divided by the length of the protein
412. The total number of tiny residues in the first quarter of the sequence divided by the total number of tiny blocks
413. The total number of tiny residues in the first quarter of the sequence divided by the total number of tiny blocks

414. The total number of tiny residues in the first quarter of the sequence divided by the total number of tiny blocks
415. The total number of tiny residues in the first quarter of the sequence divided by the total number of tiny blocks
416. The total number of tiny residues in the first half of the protein
417. The total number of tiny residues in the three-quarter region of the protein
418. The total number of tiny residues from position 25% to 75% of the protein
419. The total number of tiny residues in the second half of the protein
420. The total number of tiny residues in the first half of the protein divided by the protein length
421. The total number of tiny residues in the three-quarter region of the protein divided by the protein length
422. The total number of tiny residues from position 25% to 75% of the protein divided by the protein length
423. The total number of tiny residues in the second half of the protein divided by the protein length
424. The total number of tiny residues in the first half of the protein divided by the total number of tiny residues in the protein
425. The total number of tiny residues in the three-quarter region of the protein divided by the total number of tiny residues in the protein
426. The total number of tiny residues from position 25% to 75% of the protein divided by the total number of tiny residues in the protein
427. The total number of tiny residues in the second half of the protein divided by the total number of tiny residues in the protein
428. The total number of tiny residue blocks in the protein
429. The total number of tiny residue blocks in the first quarter of the protein
430. The total number of tiny residue blocks in the second quarter of the protein
431. The total number of tiny residue blocks in the third quarter of the protein
432. The total number of tiny residue blocks in the fourth quarter of the protein
433. The total number of tiny residue blocks in the first quarter of the protein divided by the protein length
434. The total number of tiny residue blocks in the second quarter of the protein divided by the protein length
435. The total number of tiny residue blocks in the third quarter of the protein divided by the protein length

436. The total number of tiny residue blocks in the fourth quarter of the protein divided by the protein length
437. The total number of tiny residue blocks in the first quarter of the protein divided by the total number of tiny blocks of the protein
438. The total number of tiny residue blocks in the second quarter of the protein divided by the total number of tiny blocks of the protein
439. The total number of tiny residue blocks in the third quarter of the protein divided by the total number of tiny blocks of the protein
440. The total number of tiny residue blocks in the fourth quarter of the protein divided by the total number of tiny blocks of the protein
441. The total number of tiny residue blocks in the first half of the protein
442. The total number of tiny residue blocks in the three-quarter region of the protein
443. The total number of tiny residue blocks from position 25% to 75% of the protein
444. The total number of tiny residue blocks in the second half of the protein
445. The total number of tiny residue blocks in the first half of the protein divided by the protein length
446. The total number of tiny residue blocks in the three-quarter region of the protein divided by the protein length
447. The total number of tiny residue blocks from position 25% to 75% of the protein divided by the protein length
448. The total number of tiny residue blocks in the second half of the protein divided by the protein length
449. The total number of tiny residue blocks in the first half of the protein divided by the total number of tiny blocks of the protein
450. The total number of tiny residue blocks in the three-quarter region of the protein divided by the total number of tiny blocks of the protein
451. The total number of tiny residue blocks from position 25% to 75% of the protein divided by the total number of tiny blocks of the protein
452. The total number of tiny residue blocks in the second half of the protein divided by the total number of tiny blocks of the protein
453. The length of the maximum tiny block in the first quarter of the protein
454. The median of the tiny blocks in the first quarter of the protein
455. The mean of the tiny blocks in the first quarter of the protein
456. The length of the maximum tiny block in the second quarter of the protein

457. The median of the tiny blocks in the second quarter of the protein
458. The mean of the tiny blocks in the second quarter of the protein
459. The length of the maximum tiny block in the third quarter of the protein
460. The median of the tiny blocks in the third quarter of the protein
461. The mean of the tiny blocks in the third quarter of the protein
462. The length of the maximum tiny block in the fourth quarter of the protein
463. The median of the tiny blocks in the fourth quarter of the protein
464. The mean of the tiny blocks in the fourth quarter of the protein
465. The length of the maximum tiny block of the protein
466. The median of the tiny blocks of the protein
467. The mean of the tiny blocks of the protein
468. The total number of diverse residues in the sequence
469. The total number of diverse residues divided by the length of the protein
470. The total number of diverse residues in the first quarter of the sequence
471. The total number of diverse residues in the second quarter of the sequence
472. The total number of diverse residues in the third quarter of the sequence
473. The total number of diverse residues in the fourth quarter of the sequence
474. The total number of diverse residues in the first quarter of the sequence divided by the length of the protein
475. The total number of diverse residues in the second quarter of the sequence divided by the length of the protein
476. The total number of diverse residues in the third quarter of the sequence divided by the length of the protein
477. The total number of diverse residues in the fourth quarter of the sequence divided by the length of the protein
478. The total number of diverse residues in the first quarter of the sequence divided by the total number of diverse blocks
479. The total number of diverse residues in the first quarter of the sequence divided by the total number of diverse blocks
480. The total number of diverse residues in the first quarter of the sequence divided by the total number of diverse blocks
481. The total number of diverse residues in the first quarter of the sequence divided by the total number of diverse blocks
482. The total number of diverse residues in the first half of the protein



483. The total number of diverse residues in the three-quarter region of the protein
484. The total number of diverse residues from position 25% to 75% of the protein
485. The total number of diverse residues in the second half of the protein
486. The total number of diverse residues in the first half of the protein divided by the protein length
487. The total number of diverse residues in the three-quarter region of the protein divided by the protein length
488. The total number of diverse residues from position 25% to 75% of the protein divided by the protein length
489. The total number of diverse residues in the second half of the protein divided by the protein length
490. The total number of diverse residues in the first half of the protein divided by the total number of diverse residues in the protein
491. The total number of diverse residues in the three-quarter region of the protein divided by the total number of diverse residues in the protein
492. The total number of diverse residues from position 25% to 75% of the protein divided by the total number of diverse residues in the protein
493. The total number of diverse residues in the second half of the protein divided by the total number of diverse residues in the protein
494. The total number of diverse residue blocks in the protein
495. The total number of diverse residue blocks in the first quarter of the protein
496. The total number of diverse residue blocks in the second quarter of the protein
497. The total number of diverse residue blocks in the third quarter of the protein
498. The total number of diverse residue blocks in the fourth quarter of the protein
499. The total number of diverse residue blocks in the first quarter of the protein divided by the protein length
500. The total number of diverse residue blocks in the second quarter of the protein divided by the protein length
501. The total number of diverse residue blocks in the third quarter of the protein divided by the protein length
502. The total number of diverse residue blocks in the fourth quarter of the protein divided by the protein length

503. The total number of diverse residue blocks in the first quarter of the protein divided by the total number of diverse blocks of the protein
504. The total number of diverse residue blocks in the second quarter of the protein divided by the total number of diverse blocks of the protein
505. The total number of diverse residue blocks in the third quarter of the protein divided by the total number of diverse blocks of the protein
506. The total number of diverse residue blocks in the fourth quarter of the protein divided by the total number of diverse blocks of the protein
507. The total number of diverse residue blocks in the first half of the protein
508. The total number of diverse residue blocks in the three-quarter region of the protein
509. The total number of diverse residue blocks from position 25% to 75% of the protein
510. The total number of diverse residue blocks in the second half of the protein
511. The total number of diverse residue blocks in the first half of the protein divided by the protein length
512. The total number of diverse residue blocks in the three-quarter region of the protein divided by the protein length
513. The total number of diverse residue blocks from position 25% to 75% of the protein divided by the protein length
514. The total number of diverse residue blocks in the second half of the protein divided by the protein length
515. The total number of diverse residue blocks in the first half of the protein divided by the total number of diverse blocks of the protein
516. The total number of diverse residue blocks in the three-quarter region of the protein divided by the total number of diverse blocks of the protein
517. The total number of diverse residue blocks from position 25% to 75% of the protein divided by the total number of diverse blocks of the protein
518. The total number of diverse residue blocks in the second half of the protein divided by the total number of diverse blocks of the protein
519. The length of the maximum diverse block in the first quarter of the protein
520. The median of the diverse blocks in the first quarter of the protein
521. The mean of the diverse blocks in the first quarter of the protein
522. The length of the maximum diverse block in the second quarter of the protein
523. The median of the diverse blocks in the second quarter of the protein

524. The mean of the diverse blocks in the second quarter of the protein
525. The length of the maximum diverse block in the third quarter of the protein
526. The median of the diverse blocks in the third quarter of the protein
527. The mean of the diverse blocks in the third quarter of the protein
528. The length of the maximum diverse block in the fourth quarter of the protein
529. The median of the diverse blocks in the fourth quarter of the protein
530. The mean of the diverse blocks in the fourth quarter of the protein
531. The length of the maximum diverse block of the protein
532. The median of the diverse blocks of the protein
533. The mean of the diverse blocks of the protein
534. The total number of positively charged residues in the sequence
535. The total number of positively charged residues divided by the length of the protein
536. The total number of positively charged residues in the first quarter of the sequence
537. The total number of positively charged residues in the second quarter of the sequence
538. The total number of positively charged residues in the third quarter of the sequence
539. The total number of positively charged residues in the fourth quarter of the sequence
540. The total number of positively charged residues in the first quarter of the sequence divided by the length of the protein
541. The total number of positively charged residues in the second quarter of the sequence divided by the length of the protein
542. The total number of positively charged residues in the third quarter of the sequence divided by the length of the protein
543. The total number of positively charged residues in the fourth quarter of the sequence divided by the length of the protein
544. The total number of positively charged residues in the first quarter of the sequence divided by the total number of positively charged blocks
545. The total number of positively charged residues in the first quarter of the sequence divided by the total number of positively charged blocks

546. The total number of positively charged residues in the first quarter of the sequence divided by the total number of positively charged blocks
547. The total number of positively charged residues in the first quarter of the sequence divided by the total number of positively charged blocks
548. The total number of positively charged residues in the first half of the protein
549. The total number of positively charged residues in the three-quarter region of the protein
550. The total number of positively charged residues from position 25% to 75% of the protein
551. The total number of positively charged residues in the second half of the protein
552. The total number of positively charged residues in the first half of the protein divided by the protein length
553. The total number of positively charged residues in the three-quarter region of the protein divided by the protein length
554. The total number of positively charged residues from position 25% to 75% of the protein divided by the protein length
555. The total number of positively charged residues in the second half of the protein divided by the protein length
556. The total number of positively charged residues in the first half of the protein divided by the total number of positively charged residues in the protein
557. The total number of positively charged residues in the three-quarter region of the protein divided by the total number of positively charged residues in the protein
558. The total number of positively charged residues from position 25% to 75% of the protein divided by the total number of positively charged residues in the protein
559. The total number of positively charged residues in the second half of the protein divided by the total number of positively charged residues in the protein
560. The total number of positively charged residue blocks in the protein
561. The total number of positively charged residue blocks in the first quarter of the protein
562. The total number of positively charged residue blocks in the second quarter of the protein
563. The total number of positively charged residue blocks in the third quarter of the protein

564. The total number of positively charged residue blocks in the fourth quarter of the protein
565. The total number of positively charged residue blocks in the first quarter of the protein divided by the protein length
566. The total number of positively charged residue blocks in the second quarter of the protein divided by the protein length
567. The total number of positively charged residue blocks in the third quarter of the protein divided by the protein length
568. The total number of positively charged residue blocks in the fourth quarter of the protein divided by the protein length
569. The total number of positively charged residue blocks in the first quarter of the protein divided by the total number of positively charged blocks of the protein
570. The total number of positively charged residue blocks in the second quarter of the protein divided by the total number of positively charged blocks of the protein
571. The total number of positively charged residue blocks in the third quarter of the protein divided by the total number of positively charged blocks of the protein
572. The total number of positively charged residue blocks in the fourth quarter of the protein divided by the total number of positively charged blocks of the protein
573. The total number of positively charged residue blocks in the first half of the protein
574. The total number of positively charged residue blocks in the three-quarter region of the protein
575. The total number of positively charged residue blocks from position 25% to 75% of the protein
576. The total number of positively charged residue blocks in the second half of the protein
577. The total number of positively charged residue blocks in the first half of the protein divided by the protein length
578. The total number of positively charged residue blocks in the three-quarter region of the protein divided by the protein length
579. The total number of positively charged residue blocks from position 25% to 75% of the protein divided by the protein length
580. The total number of positively charged residue blocks in the second half of the protein divided by the protein length

581. The total number of positively charged residue blocks in the first half of the protein divided by the total number of positively charged blocks of the protein
582. The total number of positively charged residue blocks in the three-quarter region of the protein divided by the total number of positively charged blocks of the protein
583. The total number of positively charged residue blocks from position 25% to 75% of the protein divided by the total number of positively charged blocks of the protein
584. The total number of positively charged residue blocks in the second half of the protein divided by the total number of positively charged blocks of the protein
585. The length of the maximum positively charged block in the first quarter of the protein
586. The median of the positively charged blocks in the first quarter of the protein
587. The mean of the positively charged blocks in the first quarter of the protein
588. The length of the maximum positively charged block in the second quarter of the protein
589. The median of the positively charged blocks in the second quarter of the protein
590. The mean of the positively charged blocks in the second quarter of the protein
591. The length of the maximum positively charged block in the third quarter of the protein
592. The median of the positively charged blocks in the third quarter of the protein
593. The mean of the positively charged blocks in the third quarter of the protein
594. The length of the maximum positively charged block in the fourth quarter of the protein
595. The median of the positively charged blocks in the fourth quarter of the protein
596. The mean of the positively charged blocks in the fourth quarter of the protein
597. The length of the maximum positively charged block of the protein
598. The median of the positively charged blocks of the protein
599. The mean of the positively charged blocks of the protein

600. The total number of negatively charged residues in the sequence
601. The total number of negatively charged residues divided by the length of the protein
602. The total number of negatively charged residues in the first quarter of the sequence
603. The total number of negatively charged residues in the second quarter of the sequence
604. The total number of negatively charged residues in the third quarter of the sequence
605. The total number of negatively charged residues in the fourth quarter of the sequence
606. The total number of negatively charged residues in the first quarter of the sequence divided by the length of the protein
607. The total number of negatively charged residues in the second quarter of the sequence divided by the length of the protein
608. The total number of negatively charged residues in the third quarter of the sequence divided by the length of the protein
609. The total number of negatively charged residues in the fourth quarter of the sequence divided by the length of the protein
610. The total number of negatively charged residues in the first quarter of the sequence divided by the total number of negatively charged blocks
611. The total number of negatively charged residues in the first quarter of the sequence divided by the total number of negatively charged blocks
612. The total number of negatively charged residues in the first quarter of the sequence divided by the total number of negatively charged blocks
613. The total number of negatively charged residues in the first quarter of the sequence divided by the total number of negatively charged blocks
614. The total number of negatively charged residues in the first half of the protein
615. The total number of negatively charged residues in the three-quarter region of the protein
616. The total number of negatively charged residues from position 25% to 75% of the protein
617. The total number of negatively charged residues in the second half of the protein
618. The total number of negatively charged residues in the first half of the protein divided by the protein length

619. The total number of negatively charged residues in the three-quarter region of the protein divided by the protein length
620. The total number of negatively charged residues from position 25% to 75% of the protein divided by the protein length
621. The total number of negatively charged residues in the second half of the protein divided by the protein length
622. The total number of negatively charged residues in the first half of the protein divided by the total number of negatively charged residues in the protein
623. The total number of negatively charged residues in the three-quarter region of the protein divided by the total number of negatively charged residues in the protein
624. The total number of negatively charged residues from position 25% to 75% of the protein divided by the total number of negatively charged residues in the protein
625. The total number of negatively charged residues in the second half of the protein divided by the total number of negatively charged residues in the protein
626. The total number of negatively charged residue blocks in the protein
627. The total number of negatively charged residue blocks in the first quarter of the protein
628. The total number of negatively charged residue blocks in the second quarter of the protein
629. The total number of negatively charged residue blocks in the third quarter of the protein
630. The total number of negatively charged residue blocks in the fourth quarter of the protein
631. The total number of negatively charged residue blocks in the first quarter of the protein divided by the protein length
632. The total number of negatively charged residue blocks in the second quarter of the protein divided by the protein length
633. The total number of negatively charged residue blocks in the third quarter of the protein divided by the protein length
634. The total number of negatively charged residue blocks in the fourth quarter of the protein divided by the protein length
635. The total number of negatively charged residue blocks in the first quarter of the protein divided by the total number of negatively charged blocks of the protein



636. The total number of negatively charged residue blocks in the second quarter of the protein divided by the total number of negatively charged blocks of the protein
637. The total number of negatively charged residue blocks in the third quarter of the protein divided by the total number of negatively charged blocks of the protein
638. The total number of negatively charged residue blocks in the fourth quarter of the protein divided by the total number of negatively charged blocks of the protein
639. The total number of negatively charged residue blocks in the first half of the protein
640. The total number of negatively charged residue blocks in the three-quarter region of the protein
641. The total number of negatively charged residue blocks from position 25% to 75% of the protein
642. The total number of negatively charged residue blocks in the second half of the protein
643. The total number of negatively charged residue blocks in the first half of the protein divided by the protein length
644. The total number of negatively charged residue blocks in the three-quarter region of the protein divided by the protein length
645. The total number of negatively charged residue blocks from position 25% to 75% of the protein divided by the protein length
646. The total number of negatively charged residue blocks in the second half of the protein divided by the protein length
647. The total number of negatively charged residue blocks in the first half of the protein divided by the total number of negatively charged blocks of the protein
648. The total number of negatively charged residue blocks in the three-quarter region of the protein divided by the total number of negatively charged blocks of the protein
649. The total number of negatively charged residue blocks from position 25% to 75% of the protein divided by the total number of negatively charged blocks of the protein
650. The total number of negatively charged residue blocks in the second half of the protein divided by the total number of negatively charged blocks of the protein
651. The length of the maximum negatively charged block in the first quarter of the protein

652. The median of the negatively charged blocks in the first quarter of the protein
653. The mean of the negatively charged blocks in the first quarter of the protein
654. The length of the maximum negatively charged block in the second quarter of the protein
655. The median of the negatively charged blocks in the second quarter of the protein
656. The mean of the negatively charged blocks in the second quarter of the protein
657. The length of the maximum negatively charged block in the third quarter of the protein
658. The median of the negatively charged blocks in the third quarter of the protein
659. The mean of the negatively charged blocks in the third quarter of the protein
660. The length of the maximum negatively charged block in the fourth quarter of the protein
661. The median of the negatively charged blocks in the fourth quarter of the protein
662. The mean of the negatively charged blocks in the fourth quarter of the protein
663. The length of the maximum negatively charged block of the protein
664. The median of the negatively charged blocks of the protein
665. The mean of the negatively charged blocks of the protein
666. The total number of polar residues in the sequence
667. The total number of polar residues divided by the length of the protein
668. The total number of polar residues in the first quarter of the sequence
669. The total number of polar residues in the second quarter of the sequence
670. The total number of polar residues in the third quarter of the sequence
671. The total number of polar residues in the fourth quarter of the sequence
672. The total number of polar residues in the first quarter of the sequence divided by the length of the protein
673. The total number of polar residues in the second quarter of the sequence divided by the length of the protein

674. The total number of polar residues in the third quarter of the sequence divided by the length of the protein
675. The total number of polar residues in the fourth quarter of the sequence divided by the length of the protein
676. The total number of polar residues in the first quarter of the sequence divided by the total number of polar blocks
677. The total number of polar residues in the first quarter of the sequence divided by the total number of polar blocks
678. The total number of polar residues in the first quarter of the sequence divided by the total number of polar blocks
679. The total number of polar residues in the first quarter of the sequence divided by the total number of polar blocks
680. The total number of polar residues in the first half of the protein
681. The total number of polar residues in the three-quarter region of the protein
682. The total number of polar residues from position 25% to 75% of the protein
683. The total number of polar residues in the second half of the protein
684. The total number of polar residues in the first half of the protein divided by the protein length
685. The total number of polar residues in the three-quarter region of the protein divided by the protein length
686. The total number of polar residues from position 25% to 75% of the protein divided by the protein length
687. The total number of polar residues in the second half of the protein divided by the protein length
688. The total number of polar residues in the first half of the protein divided by the total number of polar residues in the protein
689. The total number of polar residues in the three-quarter region of the protein divided by the total number of polar residues in the protein
690. The total number of polar residues from position 25% to 75% of the protein divided by the total number of polar residues in the protein
691. The total number of polar residues in the second half of the protein divided by the total number of polar residues in the protein
692. The total number of polar residue blocks in the protein
693. The total number of polar residue blocks in the first quarter of the protein
694. The total number of polar residue blocks in the second quarter of the protein

695. The total number of polar residue blocks in the third quarter of the protein
696. The total number of polar residue blocks in the fourth quarter of the protein
697. The total number of polar residue blocks in the first quarter of the protein divided by the protein length
698. The total number of polar residue blocks in the second quarter of the protein divided by the protein length
699. The total number of polar residue blocks in the third quarter of the protein divided by the protein length
700. The total number of polar residue blocks in the fourth quarter of the protein divided by the protein length
701. The total number of polar residue blocks in the first quarter of the protein divided by the total number of polar blocks of the protein
702. The total number of polar residue blocks in the second quarter of the protein divided by the total number of polar blocks of the protein
703. The total number of polar residue blocks in the third quarter of the protein divided by the total number of polar blocks of the protein
704. The total number of polar residue blocks in the fourth quarter of the protein divided by the total number of polar blocks of the protein
705. The total number of polar residue blocks in the first half of the protein
706. The total number of polar residue blocks in the three-quarter region of the protein
707. The total number of polar residue blocks from position 25% to 75% of the protein
708. The total number of polar residue blocks in the second half of the protein
709. The total number of polar residue blocks in the first half of the protein divided by the protein length
710. The total number of polar residue blocks in the three-quarter region of the protein divided by the protein length
711. The total number of polar residue blocks from position 25% to 75% of the protein divided by the protein length
712. The total number of polar residue blocks in the second half of the protein divided by the protein length
713. The total number of polar residue blocks in the first half of the protein divided by the total number of polar blocks of the protein
714. The total number of polar residue blocks in the three-quarter region of the protein divided by the total number of polar blocks of the protein

715. The total number of polar residue blocks from position 25% to 75% of the protein divided by the total number of polar blocks of the protein
716. The total number of polar residue blocks in the second half of the protein divided by the total number of polar blocks of the protein
717. The length of the maximum polar block in the first quarter of the protein
718. The median of the polar blocks in the first quarter of the protein
719. The mean of the polar blocks in the first quarter of the protein
720. The length of the maximum polar block in the second quarter of the protein
721. The median of the polar blocks in the second quarter of the protein
722. The mean of the polar blocks in the second quarter of the protein
723. The length of the maximum polar block in the third quarter of the protein
724. The median of the polar blocks in the third quarter of the protein
725. The mean of the polar blocks in the third quarter of the protein
726. The length of the maximum polar block in the fourth quarter of the protein
727. The median of the polar blocks in the fourth quarter of the protein
728. The mean of the polar blocks in the fourth quarter of the protein
729. The length of the maximum polar block of the protein
730. The median of the polar blocks of the protein
731. The mean of the polar blocks of the protein
732. The total number of amides residues in the sequence
733. The total number of amides residues divided by the length of the protein
734. The total number of amides residues in the first quarter of the sequence
735. The total number of amides residues in the second quarter of the sequence
736. The total number of amides residues in the third quarter of the sequence
737. The total number of amides residues in the fourth quarter of the sequence
738. The total number of amides residues in the first quarter of the sequence divided by the length of the protein
739. The total number of amides residues in the second quarter of the sequence divided by the length of the protein
740. The total number of amides residues in the third quarter of the sequence divided by the length of the protein

741. The total number of amides residues in the fourth quarter of the sequence divided by the length of the protein
742. The total number of amides residues in the first quarter of the sequence divided by the total number of amides blocks
743. The total number of amides residues in the first quarter of the sequence divided by the total number of amides blocks
744. The total number of amides residues in the first quarter of the sequence divided by the total number of amides blocks
745. The total number of amides residues in the first quarter of the sequence divided by the total number of amides blocks
746. The total number of amides residues in the first half of the protein
747. The total number of amides residues in the three-quarter region of the protein
748. The total number of amides residues from position 25% to 75% of the protein
749. The total number of amides residues in the second half of the protein
750. The total number of amides residues in the first half of the protein divided by the protein length
751. The total number of amides residues in the three-quarter region of the protein divided by the protein length
752. The total number of amides residues from position 25% to 75% of the protein divided by the protein length
753. The total number of amides residues in the second half of the protein divided by the protein length
754. The total number of amides residues in the first half of the protein divided by the total number of amides residues in the protein
755. The total number of amides residues in the three-quarter region of the protein divided by the total number of amides residues in the protein
756. The total number of amides residues from position 25% to 75% of the protein divided by the total number of amides residues in the protein
757. The total number of amides residues in the second half of the protein divided by the total number of amides residues in the protein
758. The total number of amides residue blocks in the protein
759. The total number of amides residue blocks in the first quarter of the protein
760. The total number of amides residue blocks in the second quarter of the protein

761. The total number of amides residue blocks in the third quarter of the protein
762. The total number of amides residue blocks in the fourth quarter of the protein
763. The total number of amides residue blocks in the first quarter of the protein divided by the protein length
764. The total number of amides residue blocks in the second quarter of the protein divided by the protein length
765. The total number of amides residue blocks in the third quarter of the protein divided by the protein length
766. The total number of amides residue blocks in the fourth quarter of the protein divided by the protein length
767. The total number of amides residue blocks in the first quarter of the protein divided by the total number of amides blocks of the protein
768. The total number of amides residue blocks in the second quarter of the protein divided by the total number of amides blocks of the protein
769. The total number of amides residue blocks in the third quarter of the protein divided by the total number of amides blocks of the protein
770. The total number of amides residue blocks in the fourth quarter of the protein divided by the total number of amides blocks of the protein
771. The total number of amides residue blocks in the first half of the protein
772. The total number of amides residue blocks in the three-quarter region of the protein
773. The total number of amides residue blocks from position 25% to 75% of the protein
774. The total number of amides residue blocks in the second half of the protein
775. The total number of amides residue blocks in the first half of the protein divided by the protein length
776. The total number of amides residue blocks in the three-quarter region of the protein divided by the protein length
777. The total number of amides residue blocks from position 25% to 75% of the protein divided by the protein length
778. The total number of amides residue blocks in the second half of the protein divided by the protein length
779. The total number of amides residue blocks in the first half of the protein divided by the total number of amides blocks of the protein
780. The total number of amides residue blocks in the three-quarter region of the protein divided by the total number of amides blocks of the protein

781. The total number of amides residue blocks from position 25% to 75% of the protein divided by the total number of amides blocks of the protein
782. The total number of amides residue blocks in the second half of the protein divided by the total number of amides blocks of the protein
783. The length of the maximum amides block in the first quarter of the protein
784. The median of the amides blocks in the first quarter of the protein
785. The mean of the amides blocks in the first quarter of the protein
786. The length of the maximum amides block in the second quarter of the protein
787. The median of the amides blocks in the second quarter of the protein
788. The mean of the amides blocks in the second quarter of the protein
789. The length of the maximum amides block in the third quarter of the protein
790. The median of the amides blocks in the third quarter of the protein
791. The mean of the amides blocks in the third quarter of the protein
792. The length of the maximum amides block in the fourth quarter of the protein
793. The median of the amides blocks in the fourth quarter of the protein
794. The mean of the amides blocks in the fourth quarter of the protein
795. The length of the maximum amides block of the protein
796. The median of the amides blocks of the protein
797. The mean of the amides blocks of the protein
798. The total number of alanine residues in the sequence
799. The total number of alanine residues divided by the length of the protein
800. The total number of alanine residues in the first quarter of the sequence
801. The total number of alanine residues in the second quarter of the sequence
802. The total number of alanine residues in the third quarter of the sequence
803. The total number of alanine residues in the fourth quarter of the sequence
804. The total number of alanine residues in the first quarter of the sequence divided by the length of the protein
805. The total number of alanine residues in the second quarter of the sequence divided by the length of the protein
806. The total number of alanine residues in the third quarter of the sequence divided by the length of the protein



807. The total number of alanine residues in the fourth quarter of the sequence divided by the length of the protein
808. The total number of alanine residues in the first quarter of the sequence divided by the total number of alanine blocks
809. The total number of alanine residues in the first quarter of the sequence divided by the total number of alanine blocks
810. The total number of alanine residues in the first quarter of the sequence divided by the total number of alanine blocks
811. The total number of alanine residues in the first quarter of the sequence divided by the total number of alanine blocks
812. The total number of alanine residues in the first half of the protein
813. The total number of alanine residues in the three-quarter region of the protein
814. The total number of alanine residues from position 25% to 75% of the protein
815. The total number of alanine residues in the second half of the protein
816. The total number of alanine residues in the first half of the protein divided by the protein length
817. The total number of alanine residues in the three-quarter region of the protein divided by the protein length
818. The total number of alanine residues from position 25% to 75% of the protein divided by the protein length
819. The total number of alanine residues in the second half of the protein divided by the protein length
820. The total number of alanine residues in the first half of the protein divided by the total number of alanine residues in the protein
821. The total number of alanine residues in the three-quarter region of the protein divided by the total number of alanine residues in the protein
822. The total number of alanine residues from position 25% to 75% of the protein divided by the total number of alanine residues in the protein
823. The total number of alanine residues in the second half of the protein divided by the total number of alanine residues in the protein
824. The total number of alanine residue blocks in the protein
825. The total number of alanine residue blocks in the first quarter of the protein
826. The total number of alanine residue blocks in the second quarter of the protein

827. The total number of alanine residue blocks in the third quarter of the protein
828. The total number of alanine residue blocks in the fourth quarter of the protein
829. The total number of alanine residue blocks in the first quarter of the protein divided by the protein length
830. The total number of alanine residue blocks in the second quarter of the protein divided by the protein length
831. The total number of alanine residue blocks in the third quarter of the protein divided by the protein length
832. The total number of alanine residue blocks in the fourth quarter of the protein divided by the protein length
833. The total number of alanine residue blocks in the first quarter of the protein divided by the total number of alanine blocks of the protein
834. The total number of alanine residue blocks in the second quarter of the protein divided by the total number of alanine blocks of the protein
835. The total number of alanine residue blocks in the third quarter of the protein divided by the total number of alanine blocks of the protein
836. The total number of alanine residue blocks in the fourth quarter of the protein divided by the total number of alanine blocks of the protein
837. The total number of alanine residue blocks in the first half of the protein
838. The total number of alanine residue blocks in the three-quarter region of the protein
839. The total number of alanine residue blocks from position 25% to 75% of the protein
840. The total number of alanine residue blocks in the second half of the protein
841. The total number of alanine residue blocks in the first half of the protein divided by the protein length
842. The total number of alanine residue blocks in the three-quarter region of the protein divided by the protein length
843. The total number of alanine residue blocks from position 25% to 75% of the protein divided by the protein length
844. The total number of alanine residue blocks in the second half of the protein divided by the protein length
845. The total number of alanine residue blocks in the first half of the protein divided by the total number of alanine blocks of the protein
846. The total number of alanine residue blocks in the three-quarter region of the protein divided by the total number of alanine blocks of the protein

847. The total number of alanine residue blocks from position 25% to 75% of the protein divided by the total number of alanine blocks of the protein
848. The total number of alanine residue blocks in the second half of the protein divided by the total number of alanine blocks of the protein
849. The length of the maximum alanine block in the first quarter of the protein
850. The median of the alanine blocks in the first quarter of the protein
851. The mean of the alanine blocks in the first quarter of the protein
852. The length of the maximum alanine block in the second quarter of the protein
853. The median of the alanine blocks in the second quarter of the protein
854. The mean of the alanine blocks in the second quarter of the protein
855. The length of the maximum alanine block in the third quarter of the protein
856. The median of the alanine blocks in the third quarter of the protein
857. The mean of the alanine blocks in the third quarter of the protein
858. The length of the maximum alanine block in the fourth quarter of the protein
859. The median of the alanine blocks in the fourth quarter of the protein
860. The mean of the alanine blocks in the fourth quarter of the protein
861. The length of the maximum alanine block of the protein
862. The median of the alanine blocks of the protein
863. The mean of the alanine blocks of the protein
864. The total number of cysteine residues in the sequence
865. The total number of cysteine residues divided by the length of the protein
866. The total number of cysteine residues in the first quarter of the sequence
867. The total number of cysteine residues in the second quarter of the sequence
868. The total number of cysteine residues in the third quarter of the sequence
869. The total number of cysteine residues in the fourth quarter of the sequence
870. The total number of cysteine residues in the first quarter of the sequence divided by the length of the protein
871. The total number of cysteine residues in the second quarter of the sequence divided by the length of the protein
872. The total number of cysteine residues in the third quarter of the sequence divided by the length of the protein

873. The total number of cysteine residues in the fourth quarter of the sequence divided by the length of the protein
874. The total number of cysteine residues in the first quarter of the sequence divided by the total number of cysteine blocks
875. The total number of cysteine residues in the first quarter of the sequence divided by the total number of cysteine blocks
876. The total number of cysteine residues in the first quarter of the sequence divided by the total number of cysteine blocks
877. The total number of cysteine residues in the first quarter of the sequence divided by the total number of cysteine blocks
878. The total number of cysteine residues in the first half of the protein
879. The total number of cysteine residues in the three-quarter region of the protein
880. The total number of cysteine residues from position 25% to 75% of the protein
881. The total number of cysteine residues in the second half of the protein
882. The total number of cysteine residues in the first half of the protein divided by the protein length
883. The total number of cysteine residues in the three-quarter region of the protein divided by the protein length
884. The total number of cysteine residues from position 25% to 75% of the protein divided by the protein length
885. The total number of cysteine residues in the second half of the protein divided by the protein length
886. The total number of cysteine residues in the first half of the protein divided by the total number of cysteine residues in the protein
887. The total number of cysteine residues in the three-quarter region of the protein divided by the total number of cysteine residues in the protein
888. The total number of cysteine residues from position 25% to 75% of the protein divided by the total number of cysteine residues in the protein
889. The total number of cysteine residues in the second half of the protein divided by the total number of cysteine residues in the protein
890. The total number of cysteine residue blocks in the protein
891. The total number of cysteine residue blocks in the first quarter of the protein
892. The total number of cysteine residue blocks in the second quarter of the protein

893. The total number of cysteine residue blocks in the third quarter of the protein
894. The total number of cysteine residue blocks in the fourth quarter of the protein
895. The total number of cysteine residue blocks in the first quarter of the protein divided by the protein length
896. The total number of cysteine residue blocks in the second quarter of the protein divided by the protein length
897. The total number of cysteine residue blocks in the third quarter of the protein divided by the protein length
898. The total number of cysteine residue blocks in the fourth quarter of the protein divided by the protein length
899. The total number of cysteine residue blocks in the first quarter of the protein divided by the total number of cysteine blocks of the protein
900. The total number of cysteine residue blocks in the second quarter of the protein divided by the total number of cysteine blocks of the protein
901. The total number of cysteine residue blocks in the third quarter of the protein divided by the total number of cysteine blocks of the protein
902. The total number of cysteine residue blocks in the fourth quarter of the protein divided by the total number of cysteine blocks of the protein
903. The total number of cysteine residue blocks in the first half of the protein
904. The total number of cysteine residue blocks in the three-quarter region of the protein
905. The total number of cysteine residue blocks from position 25% to 75% of the protein
906. The total number of cysteine residue blocks in the second half of the protein
907. The total number of cysteine residue blocks in the first half of the protein divided by the protein length
908. The total number of cysteine residue blocks in the three-quarter region of the protein divided by the protein length
909. The total number of cysteine residue blocks from position 25% to 75% of the protein divided by the protein length
910. The total number of cysteine residue blocks in the second half of the protein divided by the protein length
911. The total number of cysteine residue blocks in the first half of the protein divided by the total number of cysteine blocks of the protein

912. The total number of cysteine residue blocks in the three-quarter region of the protein divided by the total number of cysteine blocks of the protein
913. The total number of cysteine residue blocks from position 25% to 75% of the protein divided by the total number of cysteine blocks of the protein
914. The total number of cysteine residue blocks in the second half of the protein divided by the total number of cysteine blocks of the protein
915. The length of the maximum cysteine block in the first quarter of the protein
916. The median of the cysteine blocks in the first quarter of the protein
917. The mean of the cysteine blocks in the first quarter of the protein
918. The length of the maximum cysteine block in the second quarter of the protein
919. The median of the cysteine blocks in the second quarter of the protein
920. The mean of the cysteine blocks in the second quarter of the protein
921. The length of the maximum cysteine block in the third quarter of the protein
922. The median of the cysteine blocks in the third quarter of the protein
923. The mean of the cysteine blocks in the third quarter of the protein
924. The length of the maximum cysteine block in the fourth quarter of the protein
925. The median of the cysteine blocks in the fourth quarter of the protein
926. The mean of the cysteine blocks in the fourth quarter of the protein
927. The length of the maximum cysteine block of the protein
928. The median of the cysteine blocks of the protein
929. The mean of the cysteine blocks of the protein
930. The total number of aspartic acid residues in the sequence
931. The total number of aspartic acid residues divided by the length of the protein
932. The total number of aspartic acid residues in the first quarter of the sequence
933. The total number of aspartic acid residues in the second quarter of the sequence
934. The total number of aspartic acid residues in the third quarter of the sequence

935. The total number of aspartic acid residues in the fourth quarter of the sequence
936. The total number of aspartic acid residues in the first quarter of the sequence divided by the length of the protein
937. The total number of aspartic acid residues in the second quarter of the sequence divided by the length of the protein
938. The total number of aspartic acid residues in the third quarter of the sequence divided by the length of the protein
939. The total number of aspartic acid residues in the fourth quarter of the sequence divided by the length of the protein
940. The total number of aspartic acid residues in the first quarter of the sequence divided by the total number of aspartic acid blocks
941. The total number of aspartic acid residues in the first quarter of the sequence divided by the total number of aspartic acid blocks
942. The total number of aspartic acid residues in the first quarter of the sequence divided by the total number of aspartic acid blocks
943. The total number of aspartic acid residues in the first quarter of the sequence divided by the total number of aspartic acid blocks
944. The total number of aspartic acid residues in the first half of the protein
945. The total number of aspartic acid residues in the three-quarter region of the protein
946. The total number of aspartic acid residues from position 25% to 75% of the protein
947. The total number of aspartic acid residues in the second half of the protein
948. The total number of aspartic acid residues in the first half of the protein divided by the protein length
949. The total number of aspartic acid residues in the three-quarter region of the protein divided by the protein length
950. The total number of aspartic acid residues from position 25% to 75% of the protein divided by the protein length
951. The total number of aspartic acid residues in the second half of the protein divided by the protein length
952. The total number of aspartic acid residues in the first half of the protein divided by the total number of aspartic acid residues in the protein
953. The total number of aspartic acid residues in the three-quarter region of the protein divided by the total number of aspartic acid residues in the protein

954. The total number of aspartic acid residues from position 25% to 75% of the protein divided by the total number of aspartic acid residues in the protein
955. The total number of aspartic acid residues in the second half of the protein divided by the total number of aspartic acid residues in the protein
956. The total number of aspartic acid residue blocks in the protein
957. The total number of aspartic acid residue blocks in the first quarter of the protein
958. The total number of aspartic acid residue blocks in the second quarter of the protein
959. The total number of aspartic acid residue blocks in the third quarter of the protein
960. The total number of aspartic acid residue blocks in the fourth quarter of the protein
961. The total number of aspartic acid residue blocks in the first quarter of the protein divided by the protein length
962. The total number of aspartic acid residue blocks in the second quarter of the protein divided by the protein length
963. The total number of aspartic acid residue blocks in the third quarter of the protein divided by the protein length
964. The total number of aspartic acid residue blocks in the fourth quarter of the protein divided by the protein length
965. The total number of aspartic acid residue blocks in the first quarter of the protein divided by the total number of aspartic acid blocks of the protein
966. The total number of aspartic acid residue blocks in the second quarter of the protein divided by the total number of aspartic acid blocks of the protein
967. The total number of aspartic acid residue blocks in the third quarter of the protein divided by the total number of aspartic acid blocks of the protein
968. The total number of aspartic acid residue blocks in the fourth quarter of the protein divided by the total number of aspartic acid blocks of the protein
969. The total number of aspartic acid residue blocks in the first half of the protein
970. The total number of aspartic acid residue blocks in the three-quarter region of the protein
971. The total number of aspartic acid residue blocks from position 25% to 75% of the protein



972. The total number of aspartic acid residue blocks in the second half of the protein
973. The total number of aspartic acid residue blocks in the first half of the protein divided by the protein length
974. The total number of aspartic acid residue blocks in the three-quarter region of the protein divided by the protein length
975. The total number of aspartic acid residue blocks from position 25% to 75% of the protein divided by the protein length
976. The total number of aspartic acid residue blocks in the second half of the protein divided by the protein length
977. The total number of aspartic acid residue blocks in the first half of the protein divided by the total number of aspartic acid blocks of the protein
978. The total number of aspartic acid residue blocks in the three-quarter region of the protein divided by the total number of aspartic acid blocks of the protein
979. The total number of aspartic acid residue blocks from position 25% to 75% of the protein divided by the total number of aspartic acid blocks of the protein
980. The total number of aspartic acid residue blocks in the second half of the protein divided by the total number of aspartic acid blocks of the protein
981. The length of the maximum aspartic acid block in the first quarter of the protein
982. The median of the aspartic acid blocks in the first quarter of the protein
983. The mean of the aspartic acid blocks in the first quarter of the protein
984. The length of the maximum aspartic acid block in the second quarter of the protein
985. The median of the aspartic acid blocks in the second quarter of the protein
986. The mean of the aspartic acid blocks in the second quarter of the protein
987. The length of the maximum aspartic acid block in the third quarter of the protein
988. The median of the aspartic acid blocks in the third quarter of the protein
989. The mean of the aspartic acid blocks in the third quarter of the protein
990. The length of the maximum aspartic acid block in the fourth quarter of the protein
991. The median of the aspartic acid blocks in the fourth quarter of the protein
992. The mean of the aspartic acid blocks in the fourth quarter of the protein

993. The length of the maximum aspartic acid block of the protein
994. The median of the aspartic acid blocks of the protein
995. The mean of the aspartic acid blocks of the protein
996. The total number of glutamic acid residues in the sequence
997. The total number of glutamic acid residues divided by the length of the protein
998. The total number of glutamic acid residues in the first quarter of the sequence
999. The total number of glutamic acid residues in the second quarter of the sequence
1000. The total number of glutamic acid residues in the third quarter of the sequence
1001. The total number of glutamic acid residues in the fourth quarter of the sequence
1002. The total number of glutamic acid residues in the first quarter of the sequence divided by the length of the protein
1003. The total number of glutamic acid residues in the second quarter of the sequence divided by the length of the protein
1004. The total number of glutamic acid residues in the third quarter of the sequence divided by the length of the protein
1005. The total number of glutamic acid residues in the fourth quarter of the sequence divided by the length of the protein
1006. The total number of glutamic acid residues in the first quarter of the sequence divided by the total number of glutamic acid blocks
1007. The total number of glutamic acid residues in the first quarter of the sequence divided by the total number of glutamic acid blocks
1008. The total number of glutamic acid residues in the first quarter of the sequence divided by the total number of glutamic acid blocks
1009. The total number of glutamic acid residues in the first quarter of the sequence divided by the total number of glutamic acid blocks
1010. The total number of glutamic acid residues in the first half of the protein
1011. The total number of glutamic acid residues in the three-quarter region of the protein
1012. The total number of glutamic acid residues from position 25% to 75% of the protein
1013. The total number of glutamic acid residues in the second half of the protein

1014. The total number of glutamic acid residues in the first half of the protein divided by the protein length
1015. The total number of glutamic acid residues in the three-quarter region of the protein divided by the protein length
1016. The total number of glutamic acid residues from position 25% to 75% of the protein divided by the protein length
1017. The total number of glutamic acid residues in the second half of the protein divided by the protein length
1018. The total number of glutamic acid residues in the first half of the protein divided by the total number of glutamic acid residues in the protein
1019. The total number of glutamic acid residues in the three-quarter region of the protein divided by the total number of glutamic acid residues in the protein
1020. The total number of glutamic acid residues from position 25% to 75% of the protein divided by the total number of glutamic acid residues in the protein
1021. The total number of glutamic acid residues in the second half of the protein divided by the total number of glutamic acid residues in the protein
1022. The total number of glutamic acid residue blocks in the protein
1023. The total number of glutamic acid residue blocks in the first quarter of the protein
1024. The total number of glutamic acid residue blocks in the second quarter of the protein
1025. The total number of glutamic acid residue blocks in the third quarter of the protein
1026. The total number of glutamic acid residue blocks in the fourth quarter of the protein
1027. The total number of glutamic acid residue blocks in the first quarter of the protein divided by the protein length
1028. The total number of glutamic acid residue blocks in the second quarter of the protein divided by the protein length
1029. The total number of glutamic acid residue blocks in the third quarter of the protein divided by the protein length
1030. The total number of glutamic acid residue blocks in the fourth quarter of the protein divided by the protein length
1031. The total number of glutamic acid residue blocks in the first quarter of the protein divided by the total number of glutamic acid blocks of the protein

1032. The total number of glutamic acid residue blocks in the second quarter of the protein divided by the total number of glutamic acid blocks of the protein
1033. The total number of glutamic acid residue blocks in the third quarter of the protein divided by the total number of glutamic acid blocks of the protein
1034. The total number of glutamic acid residue blocks in the fourth quarter of the protein divided by the total number of glutamic acid blocks of the protein
1035. The total number of glutamic acid residue blocks in the first half of the protein
1036. The total number of glutamic acid residue blocks in the three-quarter region of the protein
1037. The total number of glutamic acid residue blocks from position 25% to 75% of the protein
1038. The total number of glutamic acid residue blocks in the second half of the protein
1039. The total number of glutamic acid residue blocks in the first half of the protein divided by the protein length
1040. The total number of glutamic acid residue blocks in the three-quarter region of the protein divided by the protein length
1041. The total number of glutamic acid residue blocks from position 25% to 75% of the protein divided by the protein length
1042. The total number of glutamic acid residue blocks in the second half of the protein divided by the protein length
1043. The total number of glutamic acid residue blocks in the first half of the protein divided by the total number of glutamic acid blocks of the protein
1044. The total number of glutamic acid residue blocks in the three-quarter region of the protein divided by the total number of glutamic acid blocks of the protein
1045. The total number of glutamic acid residue blocks from position 25% to 75% of the protein divided by the total number of glutamic acid blocks of the protein
1046. The total number of glutamic acid residue blocks in the second half of the protein divided by the total number of glutamic acid blocks of the protein
1047. The length of the maximum glutamic acid block in the first quarter of the protein
1048. The median of the glutamic acid blocks in the first quarter of the protein
1049. The mean of the glutamic acid blocks in the first quarter of the protein

1050. The length of the maximum glutamic acid block in the second quarter of the protein
1051. The median of the glutamic acid blocks in the second quarter of the protein
1052. The mean of the glutamic acid blocks in the second quarter of the protein
1053. The length of the maximum glutamic acid block in the third quarter of the protein
1054. The median of the glutamic acid blocks in the third quarter of the protein
1055. The mean of the glutamic acid blocks in the third quarter of the protein
1056. The length of the maximum glutamic acid block in the fourth quarter of the protein
1057. The median of the glutamic acid blocks in the fourth quarter of the protein
1058. The mean of the glutamic acid blocks in the fourth quarter of the protein
1059. The length of the maximum glutamic acid block of the protein
1060. The median of the glutamic acid blocks of the protein
1061. The mean of the glutamic acid blocks of the protein
1062. The total number of phenylalanine residues in the sequence
1063. The total number of phenylalanine residues divided by the length of the protein
1064. The total number of phenylalanine residues in the first quarter of the sequence
1065. The total number of phenylalanine residues in the second quarter of the sequence
1066. The total number of phenylalanine residues in the third quarter of the sequence
1067. The total number of phenylalanine residues in the fourth quarter of the sequence
1068. The total number of phenylalanine residues in the first quarter of the sequence divided by the length of the protein
1069. The total number of phenylalanine residues in the second quarter of the sequence divided by the length of the protein
1070. The total number of phenylalanine residues in the third quarter of the sequence divided by the length of the protein
1071. The total number of phenylalanine residues in the fourth quarter of the sequence divided by the length of the protein
1072. The total number of phenylalanine residues in the first quarter of the sequence divided by the total number of phenylalanine blocks

1073. The total number of phenylalanine residues in the first quarter of the sequence divided by the total number of phenylalanine blocks
1074. The total number of phenylalanine residues in the first quarter of the sequence divided by the total number of phenylalanine blocks
1075. The total number of phenylalanine residues in the first quarter of the sequence divided by the total number of phenylalanine blocks
1076. The total number of phenylalanine residues in the first half of the protein
1077. The total number of phenylalanine residues in the three-quarter region of the protein
1078. The total number of phenylalanine residues from position 25% to 75% of the protein
1079. The total number of phenylalanine residues in the second half of the protein
1080. The total number of phenylalanine residues in the first half of the protein divided by the protein length
1081. The total number of phenylalanine residues in the three-quarter region of the protein divided by the protein length
1082. The total number of phenylalanine residues from position 25% to 75% of the protein divided by the protein length
1083. The total number of phenylalanine residues in the second half of the protein divided by the protein length
1084. The total number of phenylalanine residues in the first half of the protein divided by the total number of phenylalanine residues in the protein
1085. The total number of phenylalanine residues in the three-quarter region of the protein divided by the total number of phenylalanine residues in the protein
1086. The total number of phenylalanine residues from position 25% to 75% of the protein divided by the total number of phenylalanine residues in the protein
1087. The total number of phenylalanine residues in the second half of the protein divided by the total number of phenylalanine residues in the protein
1088. The total number of phenylalanine residue blocks in the protein
1089. The total number of phenylalanine residue blocks in the first quarter of the protein
1090. The total number of phenylalanine residue blocks in the second quarter of the protein
1091. The total number of phenylalanine residue blocks in the third quarter of the protein

1092. The total number of phenylalanine residue blocks in the fourth quarter of the protein
1093. The total number of phenylalanine residue blocks in the first quarter of the protein divided by the protein length
1094. The total number of phenylalanine residue blocks in the second quarter of the protein divided by the protein length
1095. The total number of phenylalanine residue blocks in the third quarter of the protein divided by the protein length
1096. The total number of phenylalanine residue blocks in the fourth quarter of the protein divided by the protein length
1097. The total number of phenylalanine residue blocks in the first quarter of the protein divided by the total number of phenylalanine blocks of the protein
1098. The total number of phenylalanine residue blocks in the second quarter of the protein divided by the total number of phenylalanine blocks of the protein
1099. The total number of phenylalanine residue blocks in the third quarter of the protein divided by the total number of phenylalanine blocks of the protein
1100. The total number of phenylalanine residue blocks in the fourth quarter of the protein divided by the total number of phenylalanine blocks of the protein
1101. The total number of phenylalanine residue blocks in the first half of the protein
1102. The total number of phenylalanine residue blocks in the three-quarter region of the protein
1103. The total number of phenylalanine residue blocks from position 25% to 75% of the protein
1104. The total number of phenylalanine residue blocks in the second half of the protein
1105. The total number of phenylalanine residue blocks in the first half of the protein divided by the protein length
1106. The total number of phenylalanine residue blocks in the three-quarter region of the protein divided by the protein length
1107. The total number of phenylalanine residue blocks from position 25% to 75% of the protein divided by the protein length
1108. The total number of phenylalanine residue blocks in the second half of the protein divided by the protein length

1109. The total number of phenylalanine residue blocks in the first half of the protein divided by the total number of phenylalanine blocks of the protein
1110. The total number of phenylalanine residue blocks in the three-quarter region of the protein divided by the total number of phenylalanine blocks of the protein
1111. The total number of phenylalanine residue blocks from position 25% to 75% of the protein divided by the total number of phenylalanine blocks of the protein
1112. The total number of phenylalanine residue blocks in the second half of the protein divided by the total number of phenylalanine blocks of the protein
1113. The length of the maximum phenylalanine block in the first quarter of the protein
1114. The median of the phenylalanine blocks in the first quarter of the protein
1115. The mean of the phenylalanine blocks in the first quarter of the protein
1116. The length of the maximum phenylalanine block in the second quarter of the protein
1117. The median of the phenylalanine blocks in the second quarter of the protein
1118. The mean of the phenylalanine blocks in the second quarter of the protein
1119. The length of the maximum phenylalanine block in the third quarter of the protein
1120. The median of the phenylalanine blocks in the third quarter of the protein
1121. The mean of the phenylalanine blocks in the third quarter of the protein
1122. The length of the maximum phenylalanine block in the fourth quarter of the protein
1123. The median of the phenylalanine blocks in the fourth quarter of the protein
1124. The mean of the phenylalanine blocks in the fourth quarter of the protein
1125. The length of the maximum phenylalanine block of the protein
1126. The median of the phenylalanine blocks of the protein
1127. The mean of the phenylalanine blocks of the protein
1128. The total number of glycine residues in the sequence
1129. The total number of glycine residues divided by the length of the protein
1130. The total number of glycine residues in the first quarter of the sequence
1131. The total number of glycine residues in the second quarter of the sequence
1132. The total number of glycine residues in the third quarter of the sequence



1133. The total number of glycine residues in the fourth quarter of the sequence
1134. The total number of glycine residues in the first quarter of the sequence divided by the length of the protein
1135. The total number of glycine residues in the second quarter of the sequence divided by the length of the protein
1136. The total number of glycine residues in the third quarter of the sequence divided by the length of the protein
1137. The total number of glycine residues in the fourth quarter of the sequence divided by the length of the protein
1138. The total number of glycine residues in the first quarter of the sequence divided by the total number of glycine blocks
1139. The total number of glycine residues in the first quarter of the sequence divided by the total number of glycine blocks
1140. The total number of glycine residues in the first quarter of the sequence divided by the total number of glycine blocks
1141. The total number of glycine residues in the first quarter of the sequence divided by the total number of glycine blocks
1142. The total number of glycine residues in the first half of the protein
1143. The total number of glycine residues in the three-quarter region of the protein
1144. The total number of glycine residues from position 25% to 75% of the protein
1145. The total number of glycine residues in the second half of the protein
1146. The total number of glycine residues in the first half of the protein divided by the protein length
1147. The total number of glycine residues in the three-quarter region of the protein divided by the protein length
1148. The total number of glycine residues from position 25% to 75% of the protein divided by the protein length
1149. The total number of glycine residues in the second half of the protein divided by the protein length
1150. The total number of glycine residues in the first half of the protein divided by the total number of glycine residues in the protein
1151. The total number of glycine residues in the three-quarter region of the protein divided by the total number of glycine residues in the protein
1152. The total number of glycine residues from position 25% to 75% of the protein divided by the total number of glycine residues in the protein

1153. The total number of glycine residues in the second half of the protein divided by the total number of glycine residues in the protein
1154. The total number of glycine residue blocks in the protein
1155. The total number of glycine residue blocks in the first quarter of the protein
1156. The total number of glycine residue blocks in the second quarter of the protein
1157. The total number of glycine residue blocks in the third quarter of the protein
1158. The total number of glycine residue blocks in the fourth quarter of the protein
1159. The total number of glycine residue blocks in the first quarter of the protein divided by the protein length
1160. The total number of glycine residue blocks in the second quarter of the protein divided by the protein length
1161. The total number of glycine residue blocks in the third quarter of the protein divided by the protein length
1162. The total number of glycine residue blocks in the fourth quarter of the protein divided by the protein length
1163. The total number of glycine residue blocks in the first quarter of the protein divided by the total number of glycine blocks of the protein
1164. The total number of glycine residue blocks in the second quarter of the protein divided by the total number of glycine blocks of the protein
1165. The total number of glycine residue blocks in the third quarter of the protein divided by the total number of glycine blocks of the protein
1166. The total number of glycine residue blocks in the fourth quarter of the protein divided by the total number of glycine blocks of the protein
1167. The total number of glycine residue blocks in the first half of the protein
1168. The total number of glycine residue blocks in the three-quarter region of the protein
1169. The total number of glycine residue blocks from position 25% to 75% of the protein
1170. The total number of glycine residue blocks in the second half of the protein
1171. The total number of glycine residue blocks in the first half of the protein divided by the protein length
1172. The total number of glycine residue blocks in the three-quarter region of the protein divided by the protein length

1173. The total number of glycine residue blocks from position 25% to 75% of the protein divided by the protein length
1174. The total number of glycine residue blocks in the second half of the protein divided by the protein length
1175. The total number of glycine residue blocks in the first half of the protein divided by the total number of glycine blocks of the protein
1176. The total number of glycine residue blocks in the three-quarter region of the protein divided by the total number of glycine blocks of the protein
1177. The total number of glycine residue blocks from position 25% to 75% of the protein divided by the total number of glycine blocks of the protein
1178. The total number of glycine residue blocks in the second half of the protein divided by the total number of glycine blocks of the protein
1179. The length of the maximum glycine block in the first quarter of the protein
1180. The median of the glycine blocks in the first quarter of the protein
1181. The mean of the glycine blocks in the first quarter of the protein
1182. The length of the maximum glycine block in the second quarter of the protein
1183. The median of the glycine blocks in the second quarter of the protein
1184. The mean of the glycine blocks in the second quarter of the protein
1185. The length of the maximum glycine block in the third quarter of the protein
1186. The median of the glycine blocks in the third quarter of the protein
1187. The mean of the glycine blocks in the third quarter of the protein
1188. The length of the maximum glycine block in the fourth quarter of the protein
1189. The median of the glycine blocks in the fourth quarter of the protein
1190. The mean of the glycine blocks in the fourth quarter of the protein
1191. The length of the maximum glycine block of the protein
1192. The median of the glycine blocks of the protein
1193. The mean of the glycine blocks of the protein
1194. The total number of histidine residues in the sequence
1195. The total number of histidine residues divided by the length of the protein
1196. The total number of histidine residues in the first quarter of the sequence

1197. The total number of histidine residues in the second quarter of the sequence
1198. The total number of histidine residues in the third quarter of the sequence
1199. The total number of histidine residues in the fourth quarter of the sequence
1200. The total number of histidine residues in the first quarter of the sequence divided by the length of the protein
1201. The total number of histidine residues in the second quarter of the sequence divided by the length of the protein
1202. The total number of histidine residues in the third quarter of the sequence divided by the length of the protein
1203. The total number of histidine residues in the fourth quarter of the sequence divided by the length of the protein
1204. The total number of histidine residues in the first quarter of the sequence divided by the total number of histidine blocks
1205. The total number of histidine residues in the first quarter of the sequence divided by the total number of histidine blocks
1206. The total number of histidine residues in the first quarter of the sequence divided by the total number of histidine blocks
1207. The total number of histidine residues in the first quarter of the sequence divided by the total number of histidine blocks
1208. The total number of histidine residues in the first half of the protein
1209. The total number of histidine residues in the three-quarter region of the protein
1210. The total number of histidine residues from position 25% to 75% of the protein
1211. The total number of histidine residues in the second half of the protein
1212. The total number of histidine residues in the first half of the protein divided by the protein length
1213. The total number of histidine residues in the three-quarter region of the protein divided by the protein length
1214. The total number of histidine residues from position 25% to 75% of the protein divided by the protein length
1215. The total number of histidine residues in the second half of the protein divided by the protein length
1216. The total number of histidine residues in the first half of the protein divided by the total number of histidine residues in the protein

1217. The total number of histidine residues in the three-quarter region of the protein divided by the total number of histidine residues in the protein
1218. The total number of histidine residues from position 25% to 75% of the protein divided by the total number of histidine residues in the protein
1219. The total number of histidine residues in the second half of the protein divided by the total number of histidine residues in the protein
1220. The total number of histidine residue blocks in the protein
1221. The total number of histidine residue blocks in the first quarter of the protein
1222. The total number of histidine residue blocks in the second quarter of the protein
1223. The total number of histidine residue blocks in the third quarter of the protein
1224. The total number of histidine residue blocks in the fourth quarter of the protein
1225. The total number of histidine residue blocks in the first quarter of the protein divided by the protein length
1226. The total number of histidine residue blocks in the second quarter of the protein divided by the protein length
1227. The total number of histidine residue blocks in the third quarter of the protein divided by the protein length
1228. The total number of histidine residue blocks in the fourth quarter of the protein divided by the protein length
1229. The total number of histidine residue blocks in the first quarter of the protein divided by the total number of histidine blocks of the protein
1230. The total number of histidine residue blocks in the second quarter of the protein divided by the total number of histidine blocks of the protein
1231. The total number of histidine residue blocks in the third quarter of the protein divided by the total number of histidine blocks of the protein
1232. The total number of histidine residue blocks in the fourth quarter of the protein divided by the total number of histidine blocks of the protein
1233. The total number of histidine residue blocks in the first half of the protein
1234. The total number of histidine residue blocks in the three-quarter region of the protein
1235. The total number of histidine residue blocks from position 25% to 75% of the protein
1236. The total number of histidine residue blocks in the second half of the protein

1237. The total number of histidine residue blocks in the first half of the protein divided by the protein length
1238. The total number of histidine residue blocks in the three-quarter region of the protein divided by the protein length
1239. The total number of histidine residue blocks from position 25% to 75% of the protein divided by the protein length
1240. The total number of histidine residue blocks in the second half of the protein divided by the protein length
1241. The total number of histidine residue blocks in the first half of the protein divided by the total number of histidine blocks of the protein
1242. The total number of histidine residue blocks in the three-quarter region of the protein divided by the total number of histidine blocks of the protein
1243. The total number of histidine residue blocks from position 25% to 75% of the protein divided by the total number of histidine blocks of the protein
1244. The total number of histidine residue blocks in the second half of the protein divided by the total number of histidine blocks of the protein
1245. The length of the maximum histidine block in the first quarter of the protein
1246. The median of the histidine blocks in the first quarter of the protein
1247. The mean of the histidine blocks in the first quarter of the protein
1248. The length of the maximum histidine block in the second quarter of the protein
1249. The median of the histidine blocks in the second quarter of the protein
1250. The mean of the histidine blocks in the second quarter of the protein
1251. The length of the maximum histidine block in the third quarter of the protein
1252. The median of the histidine blocks in the third quarter of the protein
1253. The mean of the histidine blocks in the third quarter of the protein
1254. The length of the maximum histidine block in the fourth quarter of the protein
1255. The median of the histidine blocks in the fourth quarter of the protein
1256. The mean of the histidine blocks in the fourth quarter of the protein
1257. The length of the maximum histidine block of the protein
1258. The median of the histidine blocks of the protein
1259. The mean of the histidine blocks of the protein

1260. The total number of lysine residues in the sequence
1261. The total number of lysine residues divided by the length of the protein
1262. The total number of lysine residues in the first quarter of the sequence
1263. The total number of lysine residues in the second quarter of the sequence
1264. The total number of lysine residues in the third quarter of the sequence
1265. The total number of lysine residues in the fourth quarter of the sequence
1266. The total number of lysine residues in the first quarter of the sequence divided by the length of the protein
1267. The total number of lysine residues in the second quarter of the sequence divided by the length of the protein
1268. The total number of lysine residues in the third quarter of the sequence divided by the length of the protein
1269. The total number of lysine residues in the fourth quarter of the sequence divided by the length of the protein
1270. The total number of lysine residues in the first quarter of the sequence divided by the total number of lysine blocks
1271. The total number of lysine residues in the first quarter of the sequence divided by the total number of lysine blocks
1272. The total number of lysine residues in the first quarter of the sequence divided by the total number of lysine blocks
1273. The total number of lysine residues in the first quarter of the sequence divided by the total number of lysine blocks
1274. The total number of lysine residues in the first half of the protein
1275. The total number of lysine residues in the three-quarter region of the protein
1276. The total number of lysine residues from position 25% to 75% of the protein
1277. The total number of lysine residues in the second half of the protein
1278. The total number of lysine residues in the first half of the protein divided by the protein length
1279. The total number of lysine residues in the three-quarter region of the protein divided by the protein length
1280. The total number of lysine residues from position 25% to 75% of the protein divided by the protein length
1281. The total number of lysine residues in the second half of the protein divided by the protein length

1282. The total number of lysine residues in the first half of the protein divided by the total number of lysine residues in the protein
1283. The total number of lysine residues in the three-quarter region of the protein divided by the total number of lysine residues in the protein
1284. The total number of lysine residues from position 25% to 75% of the protein divided by the total number of lysine residues in the protein
1285. The total number of lysine residues in the second half of the protein divided by the total number of lysine residues in the protein
1286. The total number of lysine residue blocks in the protein
1287. The total number of lysine residue blocks in the first quarter of the protein
1288. The total number of lysine residue blocks in the second quarter of the protein
1289. The total number of lysine residue blocks in the third quarter of the protein
1290. The total number of lysine residue blocks in the fourth quarter of the protein
1291. The total number of lysine residue blocks in the first quarter of the protein divided by the protein length
1292. The total number of lysine residue blocks in the second quarter of the protein divided by the protein length
1293. The total number of lysine residue blocks in the third quarter of the protein divided by the protein length
1294. The total number of lysine residue blocks in the fourth quarter of the protein divided by the protein length
1295. The total number of lysine residue blocks in the first quarter of the protein divided by the total number of lysine blocks of the protein
1296. The total number of lysine residue blocks in the second quarter of the protein divided by the total number of lysine blocks of the protein
1297. The total number of lysine residue blocks in the third quarter of the protein divided by the total number of lysine blocks of the protein
1298. The total number of lysine residue blocks in the fourth quarter of the protein divided by the total number of lysine blocks of the protein
1299. The total number of lysine residue blocks in the first half of the protein
1300. The total number of lysine residue blocks in the three-quarter region of the protein
1301. The total number of lysine residue blocks from position 25% to 75% of the protein
1302. The total number of lysine residue blocks in the second half of the protein



1303. The total number of lysine residue blocks in the first half of the protein divided by the protein length
1304. The total number of lysine residue blocks in the three-quarter region of the protein divided by the protein length
1305. The total number of lysine residue blocks from position 25% to 75% of the protein divided by the protein length
1306. The total number of lysine residue blocks in the second half of the protein divided by the protein length
1307. The total number of lysine residue blocks in the first half of the protein divided by the total number of lysine blocks of the protein
1308. The total number of lysine residue blocks in the three-quarter region of the protein divided by the total number of lysine blocks of the protein
1309. The total number of lysine residue blocks from position 25% to 75% of the protein divided by the total number of lysine blocks of the protein
1310. The total number of lysine residue blocks in the second half of the protein divided by the total number of lysine blocks of the protein
1311. The length of the maximum lysine block in the first quarter of the protein
1312. The median of the lysine blocks in the first quarter of the protein
1313. The mean of the lysine blocks in the first quarter of the protein
1314. The length of the maximum lysine block in the second quarter of the protein
1315. The median of the lysine blocks in the second quarter of the protein
1316. The mean of the lysine blocks in the second quarter of the protein
1317. The length of the maximum lysine block in the third quarter of the protein
1318. The median of the lysine blocks in the third quarter of the protein
1319. The mean of the lysine blocks in the third quarter of the protein
1320. The length of the maximum lysine block in the fourth quarter of the protein
1321. The median of the lysine blocks in the fourth quarter of the protein
1322. The mean of the lysine blocks in the fourth quarter of the protein
1323. The length of the maximum lysine block of the protein
1324. The median of the lysine blocks of the protein
1325. The mean of the lysine blocks of the protein
1326. The total number of isoleucine residues in the sequence

1327. The total number of isoleucine residues divided by the length of the protein
1328. The total number of isoleucine residues in the first quarter of the sequence
1329. The total number of isoleucine residues in the second quarter of the sequence
1330. The total number of isoleucine residues in the third quarter of the sequence
1331. The total number of isoleucine residues in the fourth quarter of the sequence
1332. The total number of isoleucine residues in the first quarter of the sequence divided by the length of the protein
1333. The total number of isoleucine residues in the second quarter of the sequence divided by the length of the protein
1334. The total number of isoleucine residues in the third quarter of the sequence divided by the length of the protein
1335. The total number of isoleucine residues in the fourth quarter of the sequence divided by the length of the protein
1336. The total number of isoleucine residues in the first quarter of the sequence divided by the total number of isoleucine blocks
1337. The total number of isoleucine residues in the first quarter of the sequence divided by the total number of isoleucine blocks
1338. The total number of isoleucine residues in the first quarter of the sequence divided by the total number of isoleucine blocks
1339. The total number of isoleucine residues in the first quarter of the sequence divided by the total number of isoleucine blocks
1340. The total number of isoleucine residues in the first half of the protein
1341. The total number of isoleucine residues in the three-quarter region of the protein
1342. The total number of isoleucine residues from position 25% to 75% of the protein
1343. The total number of isoleucine residues in the second half of the protein
1344. The total number of isoleucine residues in the first half of the protein divided by the protein length
1345. The total number of isoleucine residues in the three-quarter region of the protein divided by the protein length
1346. The total number of isoleucine residues from position 25% to 75% of the protein divided by the protein length
1347. The total number of isoleucine residues in the second half of the protein divided by the protein length

1348. The total number of isoleucine residues in the first half of the protein divided by the total number of isoleucine residues in the protein
1349. The total number of isoleucine residues in the three-quarter region of the protein divided by the total number of isoleucine residues in the protein
1350. The total number of isoleucine residues from position 25% to 75% of the protein divided by the total number of isoleucine residues in the protein
1351. The total number of isoleucine residues in the second half of the protein divided by the total number of isoleucine residues in the protein
1352. The total number of isoleucine residue blocks in the protein
1353. The total number of isoleucine residue blocks in the first quarter of the protein
1354. The total number of isoleucine residue blocks in the second quarter of the protein
1355. The total number of isoleucine residue blocks in the third quarter of the protein
1356. The total number of isoleucine residue blocks in the fourth quarter of the protein
1357. The total number of isoleucine residue blocks in the first quarter of the protein divided by the protein length
1358. The total number of isoleucine residue blocks in the second quarter of the protein divided by the protein length
1359. The total number of isoleucine residue blocks in the third quarter of the protein divided by the protein length
1360. The total number of isoleucine residue blocks in the fourth quarter of the protein divided by the protein length
1361. The total number of isoleucine residue blocks in the first quarter of the protein divided by the total number of isoleucine blocks of the protein
1362. The total number of isoleucine residue blocks in the second quarter of the protein divided by the total number of isoleucine blocks of the protein
1363. The total number of isoleucine residue blocks in the third quarter of the protein divided by the total number of isoleucine blocks of the protein
1364. The total number of isoleucine residue blocks in the fourth quarter of the protein divided by the total number of isoleucine blocks of the protein
1365. The total number of isoleucine residue blocks in the first half of the protein
1366. The total number of isoleucine residue blocks in the three-quarter region of the protein
1367. The total number of isoleucine residue blocks from position 25% to 75% of the protein

1368. The total number of isoleucine residue blocks in the second half of the protein
1369. The total number of isoleucine residue blocks in the first half of the protein divided by the protein length
1370. The total number of isoleucine residue blocks in the three-quarter region of the protein divided by the protein length
1371. The total number of isoleucine residue blocks from position 25% to 75% of the protein divided by the protein length
1372. The total number of isoleucine residue blocks in the second half of the protein divided by the protein length
1373. The total number of isoleucine residue blocks in the first half of the protein divided by the total number of isoleucine blocks of the protein
1374. The total number of isoleucine residue blocks in the three-quarter region of the protein divided by the total number of isoleucine blocks of the protein
1375. The total number of isoleucine residue blocks from position 25% to 75% of the protein divided by the total number of isoleucine blocks of the protein
1376. The total number of isoleucine residue blocks in the second half of the protein divided by the total number of isoleucine blocks of the protein
1377. The length of the maximum isoleucine block in the first quarter of the protein
1378. The median of the isoleucine blocks in the first quarter of the protein
1379. The mean of the isoleucine blocks in the first quarter of the protein
1380. The length of the maximum isoleucine block in the second quarter of the protein
1381. The median of the isoleucine blocks in the second quarter of the protein
1382. The mean of the isoleucine blocks in the second quarter of the protein
1383. The length of the maximum isoleucine block in the third quarter of the protein
1384. The median of the isoleucine blocks in the third quarter of the protein
1385. The mean of the isoleucine blocks in the third quarter of the protein
1386. The length of the maximum isoleucine block in the fourth quarter of the protein
1387. The median of the isoleucine blocks in the fourth quarter of the protein
1388. The mean of the isoleucine blocks in the fourth quarter of the protein
1389. The length of the maximum isoleucine block of the protein

1390. The median of the isoleucine blocks of the protein
1391. The mean of the isoleucine blocks of the protein
1392. The total number of leucine residues in the sequence
1393. The total number of leucine residues divided by the length of the protein
1394. The total number of leucine residues in the first quarter of the sequence
1395. The total number of leucine residues in the second quarter of the sequence
1396. The total number of leucine residues in the third quarter of the sequence
1397. The total number of leucine residues in the fourth quarter of the sequence
1398. The total number of leucine residues in the first quarter of the sequence divided by the length of the protein
1399. The total number of leucine residues in the second quarter of the sequence divided by the length of the protein
1400. The total number of leucine residues in the third quarter of the sequence divided by the length of the protein
1401. The total number of leucine residues in the fourth quarter of the sequence divided by the length of the protein
1402. The total number of leucine residues in the first quarter of the sequence divided by the total number of leucine blocks
1403. The total number of leucine residues in the first quarter of the sequence divided by the total number of leucine blocks
1404. The total number of leucine residues in the first quarter of the sequence divided by the total number of leucine blocks
1405. The total number of leucine residues in the first quarter of the sequence divided by the total number of leucine blocks
1406. The total number of leucine residues in the first half of the protein
1407. The total number of leucine residues in the three-quarter region of the protein
1408. The total number of leucine residues from position 25% to 75% of the protein
1409. The total number of leucine residues in the second half of the protein
1410. The total number of leucine residues in the first half of the protein divided by the protein length
1411. The total number of leucine residues in the three-quarter region of the protein divided by the protein length
1412. The total number of leucine residues from position 25% to 75% of the protein divided by the protein length

1413. The total number of leucine residues in the second half of the protein divided by the protein length
1414. The total number of leucine residues in the first half of the protein divided by the total number of leucine residues in the protein
1415. The total number of leucine residues in the three-quarter region of the protein divided by the total number of leucine residues in the protein
1416. The total number of leucine residues from position 25% to 75% of the protein divided by the total number of leucine residues in the protein
1417. The total number of leucine residues in the second half of the protein divided by the total number of leucine residues in the protein
1418. The total number of leucine residue blocks in the protein
1419. The total number of leucine residue blocks in the first quarter of the protein
1420. The total number of leucine residue blocks in the second quarter of the protein
1421. The total number of leucine residue blocks in the third quarter of the protein
1422. The total number of leucine residue blocks in the fourth quarter of the protein
1423. The total number of leucine residue blocks in the first quarter of the protein divided by the protein length
1424. The total number of leucine residue blocks in the second quarter of the protein divided by the protein length
1425. The total number of leucine residue blocks in the third quarter of the protein divided by the protein length
1426. The total number of leucine residue blocks in the fourth quarter of the protein divided by the protein length
1427. The total number of leucine residue blocks in the first quarter of the protein divided by the total number of leucine blocks of the protein
1428. The total number of leucine residue blocks in the second quarter of the protein divided by the total number of leucine blocks of the protein
1429. The total number of leucine residue blocks in the third quarter of the protein divided by the total number of leucine blocks of the protein
1430. The total number of leucine residue blocks in the fourth quarter of the protein divided by the total number of leucine blocks of the protein
1431. The total number of leucine residue blocks in the first half of the protein
1432. The total number of leucine residue blocks in the three-quarter region of the protein

1433. The total number of leucine residue blocks from position 25% to 75% of the protein
1434. The total number of leucine residue blocks in the second half of the protein
1435. The total number of leucine residue blocks in the first half of the protein divided by the protein length
1436. The total number of leucine residue blocks in the three-quarter region of the protein divided by the protein length
1437. The total number of leucine residue blocks from position 25% to 75% of the protein divided by the protein length
1438. The total number of leucine residue blocks in the second half of the protein divided by the protein length
1439. The total number of leucine residue blocks in the first half of the protein divided by the total number of leucine blocks of the protein
1440. The total number of leucine residue blocks in the three-quarter region of the protein divided by the total number of leucine blocks of the protein
1441. The total number of leucine residue blocks from position 25% to 75% of the protein divided by the total number of leucine blocks of the protein
1442. The total number of leucine residue blocks in the second half of the protein divided by the total number of leucine blocks of the protein
1443. The length of the maximum leucine block in the first quarter of the protein
1444. The median of the leucine blocks in the first quarter of the protein
1445. The mean of the leucine blocks in the first quarter of the protein
1446. The length of the maximum leucine block in the second quarter of the protein
1447. The median of the leucine blocks in the second quarter of the protein
1448. The mean of the leucine blocks in the second quarter of the protein
1449. The length of the maximum leucine block in the third quarter of the protein
1450. The median of the leucine blocks in the third quarter of the protein
1451. The mean of the leucine blocks in the third quarter of the protein
1452. The length of the maximum leucine block in the fourth quarter of the protein
1453. The median of the leucine blocks in the fourth quarter of the protein
1454. The mean of the leucine blocks in the fourth quarter of the protein
1455. The length of the maximum leucine block of the protein

1456. The median of the leucine blocks of the protein
1457. The mean of the leucine blocks of the protein
1458. The total number of methionine residues in the sequence
1459. The total number of methionine residues divided by the length of the protein
1460. The total number of methionine residues in the first quarter of the sequence
1461. The total number of methionine residues in the second quarter of the sequence
1462. The total number of methionine residues in the third quarter of the sequence
1463. The total number of methionine residues in the fourth quarter of the sequence
1464. The total number of methionine residues in the first quarter of the sequence divided by the length of the protein
1465. The total number of methionine residues in the second quarter of the sequence divided by the length of the protein
1466. The total number of methionine residues in the third quarter of the sequence divided by the length of the protein
1467. The total number of methionine residues in the fourth quarter of the sequence divided by the length of the protein
1468. The total number of methionine residues in the first quarter of the sequence divided by the total number of methionine blocks
1469. The total number of methionine residues in the first quarter of the sequence divided by the total number of methionine blocks
1470. The total number of methionine residues in the first quarter of the sequence divided by the total number of methionine blocks
1471. The total number of methionine residues in the first quarter of the sequence divided by the total number of methionine blocks
1472. The total number of methionine residues in the first half of the protein
1473. The total number of methionine residues in the three-quarter region of the protein
1474. The total number of methionine residues from position 25% to 75% of the protein
1475. The total number of methionine residues in the second half of the protein
1476. The total number of methionine residues in the first half of the protein divided by the protein length



1477. The total number of methionine residues in the three-quarter region of the protein divided by the protein length
1478. The total number of methionine residues from position 25% to 75% of the protein divided by the protein length
1479. The total number of methionine residues in the second half of the protein divided by the protein length
1480. The total number of methionine residues in the first half of the protein divided by the total number of methionine residues in the protein
1481. The total number of methionine residues in the three-quarter region of the protein divided by the total number of methionine residues in the protein
1482. The total number of methionine residues from position 25% to 75% of the protein divided by the total number of methionine residues in the protein
1483. The total number of methionine residues in the second half of the protein divided by the total number of methionine residues in the protein
1484. The total number of methionine residue blocks in the protein
1485. The total number of methionine residue blocks in the first quarter of the protein
1486. The total number of methionine residue blocks in the second quarter of the protein
1487. The total number of methionine residue blocks in the third quarter of the protein
1488. The total number of methionine residue blocks in the fourth quarter of the protein
1489. The total number of methionine residue blocks in the first quarter of the protein divided by the protein length
1490. The total number of methionine residue blocks in the second quarter of the protein divided by the protein length
1491. The total number of methionine residue blocks in the third quarter of the protein divided by the protein length
1492. The total number of methionine residue blocks in the fourth quarter of the protein divided by the protein length
1493. The total number of methionine residue blocks in the first quarter of the protein divided by the total number of methionine blocks of the protein
1494. The total number of methionine residue blocks in the second quarter of the protein divided by the total number of methionine blocks of the protein
1495. The total number of methionine residue blocks in the third quarter of the protein divided by the total number of methionine blocks of the protein

1496. The total number of methionine residue blocks in the fourth quarter of the protein divided by the total number of methionine blocks of the protein
1497. The total number of methionine residue blocks in the first half of the protein
1498. The total number of methionine residue blocks in the three-quarter region of the protein
1499. The total number of methionine residue blocks from position 25% to 75% of the protein
1500. The total number of methionine residue blocks in the second half of the protein
1501. The total number of methionine residue blocks in the first half of the protein divided by the protein length
1502. The total number of methionine residue blocks in the three-quarter region of the protein divided by the protein length
1503. The total number of methionine residue blocks from position 25% to 75% of the protein divided by the protein length
1504. The total number of methionine residue blocks in the second half of the protein divided by the protein length
1505. The total number of methionine residue blocks in the first half of the protein divided by the total number of methionine blocks of the protein
1506. The total number of methionine residue blocks in the three-quarter region of the protein divided by the total number of methionine blocks of the protein
1507. The total number of methionine residue blocks from position 25% to 75% of the protein divided by the total number of methionine blocks of the protein
1508. The total number of methionine residue blocks in the second half of the protein divided by the total number of methionine blocks of the protein
1509. The length of the maximum methionine block in the first quarter of the protein
1510. The median of the methionine blocks in the first quarter of the protein
1511. The mean of the methionine blocks in the first quarter of the protein
1512. The length of the maximum methionine block in the second quarter of the protein
1513. The median of the methionine blocks in the second quarter of the protein
1514. The mean of the methionine blocks in the second quarter of the protein
1515. The length of the maximum methionine block in the third quarter of the protein

1516. The median of the methionine blocks in the third quarter of the protein
1517. The mean of the methionine blocks in the third quarter of the protein
1518. The length of the maximum methionine block in the fourth quarter of the protein
1519. The median of the methionine blocks in the fourth quarter of the protein
1520. The mean of the methionine blocks in the fourth quarter of the protein
1521. The length of the maximum methionine block of the protein
1522. The median of the methionine blocks of the protein
1523. The mean of the methionine blocks of the protein
1524. The total number of asparagine residues in the sequence
1525. The total number of asparagine residues divided by the length of the protein
1526. The total number of asparagine residues in the first quarter of the sequence
1527. The total number of asparagine residues in the second quarter of the sequence
1528. The total number of asparagine residues in the third quarter of the sequence
1529. The total number of asparagine residues in the fourth quarter of the sequence
1530. The total number of asparagine residues in the first quarter of the sequence divided by the length of the protein
1531. The total number of asparagine residues in the second quarter of the sequence divided by the length of the protein
1532. The total number of asparagine residues in the third quarter of the sequence divided by the length of the protein
1533. The total number of asparagine residues in the fourth quarter of the sequence divided by the length of the protein
1534. The total number of asparagine residues in the first quarter of the sequence divided by the total number of asparagine blocks
1535. The total number of asparagine residues in the first quarter of the sequence divided by the total number of asparagine blocks
1536. The total number of asparagine residues in the first quarter of the sequence divided by the total number of asparagine blocks
1537. The total number of asparagine residues in the first quarter of the sequence divided by the total number of asparagine blocks

1538. The total number of asparagine residues in the first half of the protein
1539. The total number of asparagine residues in the three-quarter region of the protein
1540. The total number of asparagine residues from position 25% to 75% of the protein
1541. The total number of asparagine residues in the second half of the protein
1542. The total number of asparagine residues in the first half of the protein divided by the protein length
1543. The total number of asparagine residues in the three-quarter region of the protein divided by the protein length
1544. The total number of asparagine residues from position 25% to 75% of the protein divided by the protein length
1545. The total number of asparagine residues in the second half of the protein divided by the protein length
1546. The total number of asparagine residues in the first half of the protein divided by the total number of asparagine residues in the protein
1547. The total number of asparagine residues in the three-quarter region of the protein divided by the total number of asparagine residues in the protein
1548. The total number of asparagine residues from position 25% to 75% of the protein divided by the total number of asparagine residues in the protein
1549. The total number of asparagine residues in the second half of the protein divided by the total number of asparagine residues in the protein
1550. The total number of asparagine residue blocks in the protein
1551. The total number of asparagine residue blocks in the first quarter of the protein
1552. The total number of asparagine residue blocks in the second quarter of the protein
1553. The total number of asparagine residue blocks in the third quarter of the protein
1554. The total number of asparagine residue blocks in the fourth quarter of the protein
1555. The total number of asparagine residue blocks in the first quarter of the protein divided by the protein length
1556. The total number of asparagine residue blocks in the second quarter of the protein divided by the protein length
1557. The total number of asparagine residue blocks in the third quarter of the protein divided by the protein length

1558. The total number of asparagine residue blocks in the fourth quarter of the protein divided by the protein length
1559. The total number of asparagine residue blocks in the first quarter of the protein divided by the total number of asparagine blocks of the protein
1560. The total number of asparagine residue blocks in the second quarter of the protein divided by the total number of asparagine blocks of the protein
1561. The total number of asparagine residue blocks in the third quarter of the protein divided by the total number of asparagine blocks of the protein
1562. The total number of asparagine residue blocks in the fourth quarter of the protein divided by the total number of asparagine blocks of the protein
1563. The total number of asparagine residue blocks in the first half of the protein
1564. The total number of asparagine residue blocks in the three-quarter region of the protein
1565. The total number of asparagine residue blocks from position 25% to 75% of the protein
1566. The total number of asparagine residue blocks in the second half of the protein
1567. The total number of asparagine residue blocks in the first half of the protein divided by the protein length
1568. The total number of asparagine residue blocks in the three-quarter region of the protein divided by the protein length
1569. The total number of asparagine residue blocks from position 25% to 75% of the protein divided by the protein length
1570. The total number of asparagine residue blocks in the second half of the protein divided by the protein length
1571. The total number of asparagine residue blocks in the first half of the protein divided by the total number of asparagine blocks of the protein
1572. The total number of asparagine residue blocks in the three-quarter region of the protein divided by the total number of asparagine blocks of the protein
1573. The total number of asparagine residue blocks from position 25% to 75% of the protein divided by the total number of asparagine blocks of the protein
1574. The total number of asparagine residue blocks in the second half of the protein divided by the total number of asparagine blocks of the protein
1575. The length of the maximum asparagine block in the first quarter of the protein

1576. The median of the asparagine blocks in the first quarter of the protein
1577. The mean of the asparagine blocks in the first quarter of the protein
1578. The length of the maximum asparagine block in the second quarter of the protein
1579. The median of the asparagine blocks in the second quarter of the protein
1580. The mean of the asparagine blocks in the second quarter of the protein
1581. The length of the maximum asparagine block in the third quarter of the protein
1582. The median of the asparagine blocks in the third quarter of the protein
1583. The mean of the asparagine blocks in the third quarter of the protein
1584. The length of the maximum asparagine block in the fourth quarter of the protein
1585. The median of the asparagine blocks in the fourth quarter of the protein
1586. The mean of the asparagine blocks in the fourth quarter of the protein
1587. The length of the maximum asparagine block of the protein
1588. The median of the asparagine blocks of the protein
1589. The mean of the asparagine blocks of the protein
1590. The total number of proline residues in the sequence
1591. The total number of proline residues divided by the length of the protein
1592. The total number of proline residues in the first quarter of the sequence
1593. The total number of proline residues in the second quarter of the sequence
1594. The total number of proline residues in the third quarter of the sequence
1595. The total number of proline residues in the fourth quarter of the sequence
1596. The total number of proline residues in the first quarter of the sequence divided by the length of the protein
1597. The total number of proline residues in the second quarter of the sequence divided by the length of the protein
1598. The total number of proline residues in the third quarter of the sequence divided by the length of the protein
1599. The total number of proline residues in the fourth quarter of the sequence divided by the length of the protein
1600. The total number of proline residues in the first quarter of the sequence divided by the total number of proline blocks

1601. The total number of proline residues in the first quarter of the sequence divided by the total number of proline blocks
1602. The total number of proline residues in the first quarter of the sequence divided by the total number of proline blocks
1603. The total number of proline residues in the first quarter of the sequence divided by the total number of proline blocks
1604. The total number of proline residues in the first half of the protein
1605. The total number of proline residues in the three-quarter region of the protein
1606. The total number of proline residues from position 25% to 75% of the protein
1607. The total number of proline residues in the second half of the protein
1608. The total number of proline residues in the first half of the protein divided by the protein length
1609. The total number of proline residues in the three-quarter region of the protein divided by the protein length
1610. The total number of proline residues from position 25% to 75% of the protein divided by the protein length
1611. The total number of proline residues in the second half of the protein divided by the protein length
1612. The total number of proline residues in the first half of the protein divided by the total number of proline residues in the protein
1613. The total number of proline residues in the three-quarter region of the protein divided by the total number of proline residues in the protein
1614. The total number of proline residues from position 25% to 75% of the protein divided by the total number of proline residues in the protein
1615. The total number of proline residues in the second half of the protein divided by the total number of proline residues in the protein
1616. The total number of proline residue blocks in the protein
1617. The total number of proline residue blocks in the first quarter of the protein
1618. The total number of proline residue blocks in the second quarter of the protein
1619. The total number of proline residue blocks in the third quarter of the protein
1620. The total number of proline residue blocks in the fourth quarter of the protein

1621. The total number of proline residue blocks in the first quarter of the protein divided by the protein length
1622. The total number of proline residue blocks in the second quarter of the protein divided by the protein length
1623. The total number of proline residue blocks in the third quarter of the protein divided by the protein length
1624. The total number of proline residue blocks in the fourth quarter of the protein divided by the protein length
1625. The total number of proline residue blocks in the first quarter of the protein divided by the total number of proline blocks of the protein
1626. The total number of proline residue blocks in the second quarter of the protein divided by the total number of proline blocks of the protein
1627. The total number of proline residue blocks in the third quarter of the protein divided by the total number of proline blocks of the protein
1628. The total number of proline residue blocks in the fourth quarter of the protein divided by the total number of proline blocks of the protein
1629. The total number of proline residue blocks in the first half of the protein
1630. The total number of proline residue blocks in the three-quarter region of the protein
1631. The total number of proline residue blocks from position 25% to 75% of the protein
1632. The total number of proline residue blocks in the second half of the protein
1633. The total number of proline residue blocks in the first half of the protein divided by the protein length
1634. The total number of proline residue blocks in the three-quarter region of the protein divided by the protein length
1635. The total number of proline residue blocks from position 25% to 75% of the protein divided by the protein length
1636. The total number of proline residue blocks in the second half of the protein divided by the protein length
1637. The total number of proline residue blocks in the first half of the protein divided by the total number of proline blocks of the protein
1638. The total number of proline residue blocks in the three-quarter region of the protein divided by the total number of proline blocks of the protein
1639. The total number of proline residue blocks from position 25% to 75% of the protein divided by the total number of proline blocks of the protein
1640. The total number of proline residue blocks in the second half of the protein divided by the total number of proline blocks of the protein



1641. The length of the maximum proline block in the first quarter of the protein
1642. The median of the proline blocks in the first quarter of the protein
1643. The mean of the proline blocks in the first quarter of the protein
1644. The length of the maximum proline block in the second quarter of the protein
1645. The median of the proline blocks in the second quarter of the protein
1646. The mean of the proline blocks in the second quarter of the protein
1647. The length of the maximum proline block in the third quarter of the protein
1648. The median of the proline blocks in the third quarter of the protein
1649. The mean of the proline blocks in the third quarter of the protein
1650. The length of the maximum proline block in the fourth quarter of the protein
1651. The median of the proline blocks in the fourth quarter of the protein
1652. The mean of the proline blocks in the fourth quarter of the protein
1653. The length of the maximum proline block of the protein
1654. The median of the proline blocks of the protein
1655. The mean of the proline blocks of the protein
1656. The total number of glutamine residues in the sequence
1657. The total number of glutamine residues divided by the length of the protein
1658. The total number of glutamine residues in the first quarter of the sequence
1659. The total number of glutamine residues in the second quarter of the sequence
1660. The total number of glutamine residues in the third quarter of the sequence
1661. The total number of glutamine residues in the fourth quarter of the sequence
1662. The total number of glutamine residues in the first quarter of the sequence divided by the length of the protein
1663. The total number of glutamine residues in the second quarter of the sequence divided by the length of the protein
1664. The total number of glutamine residues in the third quarter of the sequence divided by the length of the protein

1665. The total number of glutamine residues in the fourth quarter of the sequence divided by the length of the protein
1666. The total number of glutamine residues in the first quarter of the sequence divided by the total number of glutamine blocks
1667. The total number of glutamine residues in the first quarter of the sequence divided by the total number of glutamine blocks
1668. The total number of glutamine residues in the first quarter of the sequence divided by the total number of glutamine blocks
1669. The total number of glutamine residues in the first quarter of the sequence divided by the total number of glutamine blocks
1670. The total number of glutamine residues in the first half of the protein
1671. The total number of glutamine residues in the three-quarter region of the protein
1672. The total number of glutamine residues from position 25% to 75% of the protein
1673. The total number of glutamine residues in the second half of the protein
1674. The total number of glutamine residues in the first half of the protein divided by the protein length
1675. The total number of glutamine residues in the three-quarter region of the protein divided by the protein length
1676. The total number of glutamine residues from position 25% to 75% of the protein divided by the protein length
1677. The total number of glutamine residues in the second half of the protein divided by the protein length
1678. The total number of glutamine residues in the first half of the protein divided by the total number of glutamine residues in the protein
1679. The total number of glutamine residues in the three-quarter region of the protein divided by the total number of glutamine residues in the protein
1680. The total number of glutamine residues from position 25% to 75% of the protein divided by the total number of glutamine residues in the protein
1681. The total number of glutamine residues in the second half of the protein divided by the total number of glutamine residues in the protein
1682. The total number of glutamine residue blocks in the protein
1683. The total number of glutamine residue blocks in the first quarter of the protein
1684. The total number of glutamine residue blocks in the second quarter of the protein

1685. The total number of glutamine residue blocks in the third quarter of the protein
1686. The total number of glutamine residue blocks in the fourth quarter of the protein
1687. The total number of glutamine residue blocks in the first quarter of the protein divided by the protein length
1688. The total number of glutamine residue blocks in the second quarter of the protein divided by the protein length
1689. The total number of glutamine residue blocks in the third quarter of the protein divided by the protein length
1690. The total number of glutamine residue blocks in the fourth quarter of the protein divided by the protein length
1691. The total number of glutamine residue blocks in the first quarter of the protein divided by the total number of glutamine blocks of the protein
1692. The total number of glutamine residue blocks in the second quarter of the protein divided by the total number of glutamine blocks of the protein
1693. The total number of glutamine residue blocks in the third quarter of the protein divided by the total number of glutamine blocks of the protein
1694. The total number of glutamine residue blocks in the fourth quarter of the protein divided by the total number of glutamine blocks of the protein
1695. The total number of glutamine residue blocks in the first half of the protein
1696. The total number of glutamine residue blocks in the three-quarter region of the protein
1697. The total number of glutamine residue blocks from position 25% to 75% of the protein
1698. The total number of glutamine residue blocks in the second half of the protein
1699. The total number of glutamine residue blocks in the first half of the protein divided by the protein length
1700. The total number of glutamine residue blocks in the three-quarter region of the protein divided by the protein length
1701. The total number of glutamine residue blocks from position 25% to 75% of the protein divided by the protein length
1702. The total number of glutamine residue blocks in the second half of the protein divided by the protein length
1703. The total number of glutamine residue blocks in the first half of the protein divided by the total number of glutamine blocks of the protein

1704. The total number of glutamine residue blocks in the three-quarter region of the protein divided by the total number of glutamine blocks of the protein
1705. The total number of glutamine residue blocks from position 25% to 75% of the protein divided by the total number of glutamine blocks of the protein
1706. The total number of glutamine residue blocks in the second half of the protein divided by the total number of glutamine blocks of the protein
1707. The length of the maximum glutamine block in the first quarter of the protein
1708. The median of the glutamine blocks in the first quarter of the protein
1709. The mean of the glutamine blocks in the first quarter of the protein
1710. The length of the maximum glutamine block in the second quarter of the protein
1711. The median of the glutamine blocks in the second quarter of the protein
1712. The mean of the glutamine blocks in the second quarter of the protein
1713. The length of the maximum glutamine block in the third quarter of the protein
1714. The median of the glutamine blocks in the third quarter of the protein
1715. The mean of the glutamine blocks in the third quarter of the protein
1716. The length of the maximum glutamine block in the fourth quarter of the protein
1717. The median of the glutamine blocks in the fourth quarter of the protein
1718. The mean of the glutamine blocks in the fourth quarter of the protein
1719. The length of the maximum glutamine block of the protein
1720. The median of the glutamine blocks of the protein
1721. The mean of the glutamine blocks of the protein
1722. The total number of arginine residues in the sequence
1723. The total number of arginine residues divided by the length of the protein
1724. The total number of arginine residues in the first quarter of the sequence
1725. The total number of arginine residues in the second quarter of the sequence
1726. The total number of arginine residues in the third quarter of the sequence
1727. The total number of arginine residues in the fourth quarter of the sequence
1728. The total number of arginine residues in the first quarter of the sequence divided by the length of the protein

1729. The total number of arginine residues in the second quarter of the sequence divided by the length of the protein
1730. The total number of arginine residues in the third quarter of the sequence divided by the length of the protein
1731. The total number of arginine residues in the fourth quarter of the sequence divided by the length of the protein
1732. The total number of arginine residues in the first quarter of the sequence divided by the total number of arginine blocks
1733. The total number of arginine residues in the first quarter of the sequence divided by the total number of arginine blocks
1734. The total number of arginine residues in the first quarter of the sequence divided by the total number of arginine blocks
1735. The total number of arginine residues in the first quarter of the sequence divided by the total number of arginine blocks
1736. The total number of arginine residues in the first half of the protein
1737. The total number of arginine residues in the three-quarter region of the protein
1738. The total number of arginine residues from position 25% to 75% of the protein
1739. The total number of arginine residues in the second half of the protein
1740. The total number of arginine residues in the first half of the protein divided by the protein length
1741. The total number of arginine residues in the three-quarter region of the protein divided by the protein length
1742. The total number of arginine residues from position 25% to 75% of the protein divided by the protein length
1743. The total number of arginine residues in the second half of the protein divided by the protein length
1744. The total number of arginine residues in the first half of the protein divided by the total number of arginine residues in the protein
1745. The total number of arginine residues in the three-quarter region of the protein divided by the total number of arginine residues in the protein
1746. The total number of arginine residues from position 25% to 75% of the protein divided by the total number of arginine residues in the protein
1747. The total number of arginine residues in the second half of the protein divided by the total number of arginine residues in the protein
1748. The total number of arginine residue blocks in the protein

1749. The total number of arginine residue blocks in the first quarter of the protein
1750. The total number of arginine residue blocks in the second quarter of the protein
1751. The total number of arginine residue blocks in the third quarter of the protein
1752. The total number of arginine residue blocks in the fourth quarter of the protein
1753. The total number of arginine residue blocks in the first quarter of the protein divided by the protein length
1754. The total number of arginine residue blocks in the second quarter of the protein divided by the protein length
1755. The total number of arginine residue blocks in the third quarter of the protein divided by the protein length
1756. The total number of arginine residue blocks in the fourth quarter of the protein divided by the protein length
1757. The total number of arginine residue blocks in the first quarter of the protein divided by the total number of arginine blocks of the protein
1758. The total number of arginine residue blocks in the second quarter of the protein divided by the total number of arginine blocks of the protein
1759. The total number of arginine residue blocks in the third quarter of the protein divided by the total number of arginine blocks of the protein
1760. The total number of arginine residue blocks in the fourth quarter of the protein divided by the total number of arginine blocks of the protein
1761. The total number of arginine residue blocks in the first half of the protein
1762. The total number of arginine residue blocks in the three-quarter region of the protein
1763. The total number of arginine residue blocks from position 25% to 75% of the protein
1764. The total number of arginine residue blocks in the second half of the protein
1765. The total number of arginine residue blocks in the first half of the protein divided by the protein length
1766. The total number of arginine residue blocks in the three-quarter region of the protein divided by the protein length
1767. The total number of arginine residue blocks from position 25% to 75% of the protein divided by the protein length

1768. The total number of arginine residue blocks in the second half of the protein divided by the protein length
1769. The total number of arginine residue blocks in the first half of the protein divided by the total number of arginine blocks of the protein
1770. The total number of arginine residue blocks in the three-quarter region of the protein divided by the total number of arginine blocks of the protein
1771. The total number of arginine residue blocks from position 25% to 75% of the protein divided by the total number of arginine blocks of the protein
1772. The total number of arginine residue blocks in the second half of the protein divided by the total number of arginine blocks of the protein
1773. The length of the maximum arginine block in the first quarter of the protein
1774. The median of the arginine blocks in the first quarter of the protein
1775. The mean of the arginine blocks in the first quarter of the protein
1776. The length of the maximum arginine block in the second quarter of the protein
1777. The median of the arginine blocks in the second quarter of the protein
1778. The mean of the arginine blocks in the second quarter of the protein
1779. The length of the maximum arginine block in the third quarter of the protein
1780. The median of the arginine blocks in the third quarter of the protein
1781. The mean of the arginine blocks in the third quarter of the protein
1782. The length of the maximum arginine block in the fourth quarter of the protein
1783. The median of the arginine blocks in the fourth quarter of the protein
1784. The mean of the arginine blocks in the fourth quarter of the protein
1785. The length of the maximum arginine block of the protein
1786. The median of the arginine blocks of the protein
1787. The mean of the arginine blocks of the protein
1788. The total number of serine residues in the sequence
1789. The total number of serine residues divided by the length of the protein
1790. The total number of serine residues in the first quarter of the sequence
1791. The total number of serine residues in the second quarter of the sequence
1792. The total number of serine residues in the third quarter of the sequence

1793. The total number of serine residues in the fourth quarter of the sequence
1794. The total number of serine residues in the first quarter of the sequence divided by the length of the protein
1795. The total number of serine residues in the second quarter of the sequence divided by the length of the protein
1796. The total number of serine residues in the third quarter of the sequence divided by the length of the protein
1797. The total number of serine residues in the fourth quarter of the sequence divided by the length of the protein
1798. The total number of serine residues in the first quarter of the sequence divided by the total number of serine blocks
1799. The total number of serine residues in the first quarter of the sequence divided by the total number of serine blocks
1800. The total number of serine residues in the first quarter of the sequence divided by the total number of serine blocks
1801. The total number of serine residues in the first quarter of the sequence divided by the total number of serine blocks
1802. The total number of serine residues in the first half of the protein
1803. The total number of serine residues in the three-quarter region of the protein
1804. The total number of serine residues from position 25% to 75% of the protein
1805. The total number of serine residues in the second half of the protein
1806. The total number of serine residues in the first half of the protein divided by the protein length
1807. The total number of serine residues in the three-quarter region of the protein divided by the protein length
1808. The total number of serine residues from position 25% to 75% of the protein divided by the protein length
1809. The total number of serine residues in the second half of the protein divided by the protein length
1810. The total number of serine residues in the first half of the protein divided by the total number of serine residues in the protein
1811. The total number of serine residues in the three-quarter region of the protein divided by the total number of serine residues in the protein
1812. The total number of serine residues from position 25% to 75% of the protein divided by the total number of serine residues in the protein



1813. The total number of serine residues in the second half of the protein divided by the total number of serine residues in the protein
1814. The total number of serine residue blocks in the protein
1815. The total number of serine residue blocks in the first quarter of the protein
1816. The total number of serine residue blocks in the second quarter of the protein
1817. The total number of serine residue blocks in the third quarter of the protein
1818. The total number of serine residue blocks in the fourth quarter of the protein
1819. The total number of serine residue blocks in the first quarter of the protein divided by the protein length
1820. The total number of serine residue blocks in the second quarter of the protein divided by the protein length
1821. The total number of serine residue blocks in the third quarter of the protein divided by the protein length
1822. The total number of serine residue blocks in the fourth quarter of the protein divided by the protein length
1823. The total number of serine residue blocks in the first quarter of the protein divided by the total number of serine blocks of the protein
1824. The total number of serine residue blocks in the second quarter of the protein divided by the total number of serine blocks of the protein
1825. The total number of serine residue blocks in the third quarter of the protein divided by the total number of serine blocks of the protein
1826. The total number of serine residue blocks in the fourth quarter of the protein divided by the total number of serine blocks of the protein
1827. The total number of serine residue blocks in the first half of the protein
1828. The total number of serine residue blocks in the three-quarter region of the protein
1829. The total number of serine residue blocks from position 25% to 75% of the protein
1830. The total number of serine residue blocks in the second half of the protein
1831. The total number of serine residue blocks in the first half of the protein divided by the protein length
1832. The total number of serine residue blocks in the three-quarter region of the protein divided by the protein length
1833. The total number of serine residue blocks from position 25% to 75% of the protein divided by the protein length

1834. The total number of serine residue blocks in the second half of the protein divided by the protein length
1835. The total number of serine residue blocks in the first half of the protein divided by the total number of serine blocks of the protein
1836. The total number of serine residue blocks in the three-quarter region of the protein divided by the total number of serine blocks of the protein
1837. The total number of serine residue blocks from position 25% to 75% of the protein divided by the total number of serine blocks of the protein
1838. The total number of serine residue blocks in the second half of the protein divided by the total number of serine blocks of the protein
1839. The length of the maximum serine block in the first quarter of the protein
1840. The median of the serine blocks in the first quarter of the protein
1841. The mean of the serine blocks in the first quarter of the protein
1842. The length of the maximum serine block in the second quarter of the protein
1843. The median of the serine blocks in the second quarter of the protein
1844. The mean of the serine blocks in the second quarter of the protein
1845. The length of the maximum serine block in the third quarter of the protein
1846. The median of the serine blocks in the third quarter of the protein
1847. The mean of the serine blocks in the third quarter of the protein
1848. The length of the maximum serine block in the fourth quarter of the protein
1849. The median of the serine blocks in the fourth quarter of the protein
1850. The mean of the serine blocks in the fourth quarter of the protein
1851. The length of the maximum serine block of the protein
1852. The median of the serine blocks of the protein
1853. The mean of the serine blocks of the protein
1854. The total number of threonine residues in the sequence
1855. The total number of threonine residues divided by the length of the protein
1856. The total number of threonine residues in the first quarter of the sequence
1857. The total number of threonine residues in the second quarter of the sequence
1858. The total number of threonine residues in the third quarter of the sequence

1859. The total number of threonine residues in the fourth quarter of the sequence
1860. The total number of threonine residues in the first quarter of the sequence divided by the length of the protein
1861. The total number of threonine residues in the second quarter of the sequence divided by the length of the protein
1862. The total number of threonine residues in the third quarter of the sequence divided by the length of the protein
1863. The total number of threonine residues in the fourth quarter of the sequence divided by the length of the protein
1864. The total number of threonine residues in the first quarter of the sequence divided by the total number of threonine blocks
1865. The total number of threonine residues in the first quarter of the sequence divided by the total number of threonine blocks
1866. The total number of threonine residues in the first quarter of the sequence divided by the total number of threonine blocks
1867. The total number of threonine residues in the first quarter of the sequence divided by the total number of threonine blocks
1868. The total number of threonine residues in the first half of the protein
1869. The total number of threonine residues in the three-quarter region of the protein
1870. The total number of threonine residues from position 25% to 75% of the protein
1871. The total number of threonine residues in the second half of the protein
1872. The total number of threonine residues in the first half of the protein divided by the protein length
1873. The total number of threonine residues in the three-quarter region of the protein divided by the protein length
1874. The total number of threonine residues from position 25% to 75% of the protein divided by the protein length
1875. The total number of threonine residues in the second half of the protein divided by the protein length
1876. The total number of threonine residues in the first half of the protein divided by the total number of threonine residues in the protein
1877. The total number of threonine residues in the three-quarter region of the protein divided by the total number of threonine residues in the protein
1878. The total number of threonine residues from position 25% to 75% of the protein divided by the total number of threonine residues in the protein

1879. The total number of threonine residues in the second half of the protein divided by the total number of threonine residues in the protein
1880. The total number of threonine residue blocks in the protein
1881. The total number of threonine residue blocks in the first quarter of the protein
1882. The total number of threonine residue blocks in the second quarter of the protein
1883. The total number of threonine residue blocks in the third quarter of the protein
1884. The total number of threonine residue blocks in the fourth quarter of the protein
1885. The total number of threonine residue blocks in the first quarter of the protein divided by the protein length
1886. The total number of threonine residue blocks in the second quarter of the protein divided by the protein length
1887. The total number of threonine residue blocks in the third quarter of the protein divided by the protein length
1888. The total number of threonine residue blocks in the fourth quarter of the protein divided by the protein length
1889. The total number of threonine residue blocks in the first quarter of the protein divided by the total number of threonine blocks of the protein
1890. The total number of threonine residue blocks in the second quarter of the protein divided by the total number of threonine blocks of the protein
1891. The total number of threonine residue blocks in the third quarter of the protein divided by the total number of threonine blocks of the protein
1892. The total number of threonine residue blocks in the fourth quarter of the protein divided by the total number of threonine blocks of the protein
1893. The total number of threonine residue blocks in the first half of the protein
1894. The total number of threonine residue blocks in the three-quarter region of the protein
1895. The total number of threonine residue blocks from position 25% to 75% of the protein
1896. The total number of threonine residue blocks in the second half of the protein
1897. The total number of threonine residue blocks in the first half of the protein divided by the protein length
1898. The total number of threonine residue blocks in the three-quarter region of the protein divided by the protein length

1899. The total number of threonine residue blocks from position 25% to 75% of the protein divided by the protein length
1900. The total number of threonine residue blocks in the second half of the protein divided by the protein length
1901. The total number of threonine residue blocks in the first half of the protein divided by the total number of threonine blocks of the protein
1902. The total number of threonine residue blocks in the three-quarter region of the protein divided by the total number of threonine blocks of the protein
1903. The total number of threonine residue blocks from position 25% to 75% of the protein divided by the total number of threonine blocks of the protein
1904. The total number of threonine residue blocks in the second half of the protein divided by the total number of threonine blocks of the protein
1905. The length of the maximum threonine block in the first quarter of the protein
1906. The median of the threonine blocks in the first quarter of the protein
1907. The mean of the threonine blocks in the first quarter of the protein
1908. The length of the maximum threonine block in the second quarter of the protein
1909. The median of the threonine blocks in the second quarter of the protein
1910. The mean of the threonine blocks in the second quarter of the protein
1911. The length of the maximum threonine block in the third quarter of the protein
1912. The median of the threonine blocks in the third quarter of the protein
1913. The mean of the threonine blocks in the third quarter of the protein
1914. The length of the maximum threonine block in the fourth quarter of the protein
1915. The median of the threonine blocks in the fourth quarter of the protein
1916. The mean of the threonine blocks in the fourth quarter of the protein
1917. The length of the maximum threonine block of the protein
1918. The median of the threonine blocks of the protein
1919. The mean of the threonine blocks of the protein
1920. The total number of valine residues in the sequence
1921. The total number of valine residues divided by the length of the protein
1922. The total number of valine residues in the first quarter of the sequence

1923. The total number of valine residues in the second quarter of the sequence
1924. The total number of valine residues in the third quarter of the sequence
1925. The total number of valine residues in the fourth quarter of the sequence
1926. The total number of valine residues in the first quarter of the sequence divided by the length of the protein
1927. The total number of valine residues in the second quarter of the sequence divided by the length of the protein
1928. The total number of valine residues in the third quarter of the sequence divided by the length of the protein
1929. The total number of valine residues in the fourth quarter of the sequence divided by the length of the protein
1930. The total number of valine residues in the first quarter of the sequence divided by the total number of valine blocks
1931. The total number of valine residues in the first quarter of the sequence divided by the total number of valine blocks
1932. The total number of valine residues in the first quarter of the sequence divided by the total number of valine blocks
1933. The total number of valine residues in the first quarter of the sequence divided by the total number of valine blocks
1934. The total number of valine residues in the first half of the protein
1935. The total number of valine residues in the three-quarter region of the protein
1936. The total number of valine residues from position 25% to 75% of the protein
1937. The total number of valine residues in the second half of the protein
1938. The total number of valine residues in the first half of the protein divided by the protein length
1939. The total number of valine residues in the three-quarter region of the protein divided by the protein length
1940. The total number of valine residues from position 25% to 75% of the protein divided by the protein length
1941. The total number of valine residues in the second half of the protein divided by the protein length
1942. The total number of valine residues in the first half of the protein divided by the total number of valine residues in the protein
1943. The total number of valine residues in the three-quarter region of the protein divided by the total number of valine residues in the protein

1944. The total number of valine residues from position 25% to 75% of the protein divided by the total number of valine residues in the protein
1945. The total number of valine residues in the second half of the protein divided by the total number of valine residues in the protein
1946. The total number of valine residue blocks in the protein
1947. The total number of valine residue blocks in the first quarter of the protein
1948. The total number of valine residue blocks in the second quarter of the protein
1949. The total number of valine residue blocks in the third quarter of the protein
1950. The total number of valine residue blocks in the fourth quarter of the protein
1951. The total number of valine residue blocks in the first quarter of the protein divided by the protein length
1952. The total number of valine residue blocks in the second quarter of the protein divided by the protein length
1953. The total number of valine residue blocks in the third quarter of the protein divided by the protein length
1954. The total number of valine residue blocks in the fourth quarter of the protein divided by the protein length
1955. The total number of valine residue blocks in the first quarter of the protein divided by the total number of valine blocks of the protein
1956. The total number of valine residue blocks in the second quarter of the protein divided by the total number of valine blocks of the protein
1957. The total number of valine residue blocks in the third quarter of the protein divided by the total number of valine blocks of the protein
1958. The total number of valine residue blocks in the fourth quarter of the protein divided by the total number of valine blocks of the protein
1959. The total number of valine residue blocks in the first half of the protein
1960. The total number of valine residue blocks in the three-quarter region of the protein
1961. The total number of valine residue blocks from position 25% to 75% of the protein
1962. The total number of valine residue blocks in the second half of the protein
1963. The total number of valine residue blocks in the first half of the protein divided by the protein length
1964. The total number of valine residue blocks in the three-quarter region of the protein divided by the protein length

1965. The total number of valine residue blocks from position 25% to 75% of the protein divided by the protein length
1966. The total number of valine residue blocks in the second half of the protein divided by the protein length
1967. The total number of valine residue blocks in the first half of the protein divided by the total number of valine blocks of the protein
1968. The total number of valine residue blocks in the three-quarter region of the protein divided by the total number of valine blocks of the protein
1969. The total number of valine residue blocks from position 25% to 75% of the protein divided by the total number of valine blocks of the protein
1970. The total number of valine residue blocks in the second half of the protein divided by the total number of valine blocks of the protein
1971. The length of the maximum valine block in the first quarter of the protein
1972. The median of the valine blocks in the first quarter of the protein
1973. The mean of the valine blocks in the first quarter of the protein
1974. The length of the maximum valine block in the second quarter of the protein
1975. The median of the valine blocks in the second quarter of the protein
1976. The mean of the valine blocks in the second quarter of the protein
1977. The length of the maximum valine block in the third quarter of the protein
1978. The median of the valine blocks in the third quarter of the protein
1979. The mean of the valine blocks in the third quarter of the protein
1980. The length of the maximum valine block in the fourth quarter of the protein
1981. The median of the valine blocks in the fourth quarter of the protein
1982. The mean of the valine blocks in the fourth quarter of the protein
1983. The length of the maximum valine block of the protein
1984. The median of the valine blocks of the protein
1985. The mean of the valine blocks of the protein
1986. The total number of tryptophan residues in the sequence
1987. The total number of tryptophan residues divided by the length of the protein
1988. The total number of tryptophan residues in the first quarter of the sequence



1989. The total number of tryptophan residues in the second quarter of the sequence
1990. The total number of tryptophan residues in the third quarter of the sequence
1991. The total number of tryptophan residues in the fourth quarter of the sequence
1992. The total number of tryptophan residues in the first quarter of the sequence divided by the length of the protein
1993. The total number of tryptophan residues in the second quarter of the sequence divided by the length of the protein
1994. The total number of tryptophan residues in the third quarter of the sequence divided by the length of the protein
1995. The total number of tryptophan residues in the fourth quarter of the sequence divided by the length of the protein
1996. The total number of tryptophan residues in the first quarter of the sequence divided by the total number of tryptophan blocks
1997. The total number of tryptophan residues in the first quarter of the sequence divided by the total number of tryptophan blocks
1998. The total number of tryptophan residues in the first quarter of the sequence divided by the total number of tryptophan blocks
1999. The total number of tryptophan residues in the first quarter of the sequence divided by the total number of tryptophan blocks
2000. The total number of tryptophan residues in the first half of the protein
2001. The total number of tryptophan residues in the three-quarter region of the protein
2002. The total number of tryptophan residues from position 25% to 75% of the protein
2003. The total number of tryptophan residues in the second half of the protein
2004. The total number of tryptophan residues in the first half of the protein divided by the protein length
2005. The total number of tryptophan residues in the three-quarter region of the protein divided by the protein length
2006. The total number of tryptophan residues from position 25% to 75% of the protein divided by the protein length
2007. The total number of tryptophan residues in the second half of the protein divided by the protein length
2008. The total number of tryptophan residues in the first half of the protein divided by the total number of tryptophan residues in the protein

2009. The total number of tryptophan residues in the three-quarter region of the protein divided by the total number of tryptophan residues in the protein
2010. The total number of tryptophan residues from position 25% to 75% of the protein divided by the total number of tryptophan residues in the protein
2011. The total number of tryptophan residues in the second half of the protein divided by the total number of tryptophan residues in the protein
2012. The total number of tryptophan residue blocks in the protein
2013. The total number of tryptophan residue blocks in the first quarter of the protein
2014. The total number of tryptophan residue blocks in the second quarter of the protein
2015. The total number of tryptophan residue blocks in the third quarter of the protein
2016. The total number of tryptophan residue blocks in the fourth quarter of the protein
2017. The total number of tryptophan residue blocks in the first quarter of the protein divided by the protein length
2018. The total number of tryptophan residue blocks in the second quarter of the protein divided by the protein length
2019. The total number of tryptophan residue blocks in the third quarter of the protein divided by the protein length
2020. The total number of tryptophan residue blocks in the fourth quarter of the protein divided by the protein length
2021. The total number of tryptophan residue blocks in the first quarter of the protein divided by the total number of tryptophan blocks of the protein
2022. The total number of tryptophan residue blocks in the second quarter of the protein divided by the total number of tryptophan blocks of the protein
2023. The total number of tryptophan residue blocks in the third quarter of the protein divided by the total number of tryptophan blocks of the protein
2024. The total number of tryptophan residue blocks in the fourth quarter of the protein divided by the total number of tryptophan blocks of the protein
2025. The total number of tryptophan residue blocks in the first half of the protein
2026. The total number of tryptophan residue blocks in the three-quarter region of the protein
2027. The total number of tryptophan residue blocks from position 25% to 75% of the protein

2028. The total number of tryptophan residue blocks in the second half of the protein
2029. The total number of tryptophan residue blocks in the first half of the protein divided by the protein length
2030. The total number of tryptophan residue blocks in the three-quarter region of the protein divided by the protein length
2031. The total number of tryptophan residue blocks from position 25% to 75% of the protein divided by the protein length
2032. The total number of tryptophan residue blocks in the second half of the protein divided by the protein length
2033. The total number of tryptophan residue blocks in the first half of the protein divided by the total number of tryptophan blocks of the protein
2034. The total number of tryptophan residue blocks in the three-quarter region of the protein divided by the total number of tryptophan blocks of the protein
2035. The total number of tryptophan residue blocks from position 25% to 75% of the protein divided by the total number of tryptophan blocks of the protein
2036. The total number of tryptophan residue blocks in the second half of the protein divided by the total number of tryptophan blocks of the protein
2037. The length of the maximum tryptophan block in the first quarter of the protein
2038. The median of the tryptophan blocks in the first quarter of the protein
2039. The mean of the tryptophan blocks in the first quarter of the protein
2040. The length of the maximum tryptophan block in the second quarter of the protein
2041. The median of the tryptophan blocks in the second quarter of the protein
2042. The mean of the tryptophan blocks in the second quarter of the protein
2043. The length of the maximum tryptophan block in the third quarter of the protein
2044. The median of the tryptophan blocks in the third quarter of the protein
2045. The mean of the tryptophan blocks in the third quarter of the protein
2046. The length of the maximum tryptophan block in the fourth quarter of the protein
2047. The median of the tryptophan blocks in the fourth quarter of the protein
2048. The mean of the tryptophan blocks in the fourth quarter of the protein

2049. The length of the maximum tryptophan block of the protein
2050. The median of the tryptophan blocks of the protein
2051. The mean of the tryptophan blocks of the protein
2052. The total number of tyrosine residues in the sequence
2053. The total number of tyrosine residues divided by the length of the protein
2054. The total number of tyrosine residues in the first quarter of the sequence
2055. The total number of tyrosine residues in the second quarter of the sequence
2056. The total number of tyrosine residues in the third quarter of the sequence
2057. The total number of tyrosine residues in the fourth quarter of the sequence
2058. The total number of tyrosine residues in the first quarter of the sequence divided by the length of the protein
2059. The total number of tyrosine residues in the second quarter of the sequence divided by the length of the protein
2060. The total number of tyrosine residues in the third quarter of the sequence divided by the length of the protein
2061. The total number of tyrosine residues in the fourth quarter of the sequence divided by the length of the protein
2062. The total number of tyrosine residues in the first quarter of the sequence divided by the total number of tyrosine blocks
2063. The total number of tyrosine residues in the first quarter of the sequence divided by the total number of tyrosine blocks
2064. The total number of tyrosine residues in the first quarter of the sequence divided by the total number of tyrosine blocks
2065. The total number of tyrosine residues in the first quarter of the sequence divided by the total number of tyrosine blocks
2066. The total number of tyrosine residues in the first half of the protein
2067. The total number of tyrosine residues in the three-quarter region of the protein
2068. The total number of tyrosine residues from position 25% to 75% of the protein
2069. The total number of tyrosine residues in the second half of the protein
2070. The total number of tyrosine residues in the first half of the protein divided by the protein length
2071. The total number of tyrosine residues in the three-quarter region of the protein divided by the protein length

2072. The total number of tyrosine residues from position 25% to 75% of the protein divided by the protein length
2073. The total number of tyrosine residues in the second half of the protein divided by the protein length
2074. The total number of tyrosine residues in the first half of the protein divided by the total number of tyrosine residues in the protein
2075. The total number of tyrosine residues in the three-quarter region of the protein divided by the total number of tyrosine residues in the protein
2076. The total number of tyrosine residues from position 25% to 75% of the protein divided by the total number of tyrosine residues in the protein
2077. The total number of tyrosine residues in the second half of the protein divided by the total number of tyrosine residues in the protein
2078. The total number of tyrosine residue blocks in the protein
2079. The total number of tyrosine residue blocks in the first quarter of the protein
2080. The total number of tyrosine residue blocks in the second quarter of the protein
2081. The total number of tyrosine residue blocks in the third quarter of the protein
2082. The total number of tyrosine residue blocks in the fourth quarter of the protein
2083. The total number of tyrosine residue blocks in the first quarter of the protein divided by the protein length
2084. The total number of tyrosine residue blocks in the second quarter of the protein divided by the protein length
2085. The total number of tyrosine residue blocks in the third quarter of the protein divided by the protein length
2086. The total number of tyrosine residue blocks in the fourth quarter of the protein divided by the protein length
2087. The total number of tyrosine residue blocks in the first quarter of the protein divided by the total number of tyrosine blocks of the protein
2088. The total number of tyrosine residue blocks in the second quarter of the protein divided by the total number of tyrosine blocks of the protein
2089. The total number of tyrosine residue blocks in the third quarter of the protein divided by the total number of tyrosine blocks of the protein
2090. The total number of tyrosine residue blocks in the fourth quarter of the protein divided by the total number of tyrosine blocks of the protein

2091. The total number of tyrosine residue blocks in the first half of the protein
2092. The total number of tyrosine residue blocks in the three-quarter region of the protein
2093. The total number of tyrosine residue blocks from position 25% to 75% of the protein
2094. The total number of tyrosine residue blocks in the second half of the protein
2095. The total number of tyrosine residue blocks in the first half of the protein divided by the protein length
2096. The total number of tyrosine residue blocks in the three-quarter region of the protein divided by the protein length
2097. The total number of tyrosine residue blocks from position 25% to 75% of the protein divided by the protein length
2098. The total number of tyrosine residue blocks in the second half of the protein divided by the protein length
2099. The total number of tyrosine residue blocks in the first half of the protein divided by the total number of tyrosine blocks of the protein
2100. The total number of tyrosine residue blocks in the three-quarter region of the protein divided by the total number of tyrosine blocks of the protein
2101. The total number of tyrosine residue blocks from position 25% to 75% of the protein divided by the total number of tyrosine blocks of the protein
2102. The total number of tyrosine residue blocks in the second half of the protein divided by the total number of tyrosine blocks of the protein
2103. The length of the maximum tyrosine block in the first quarter of the protein
2104. The median of the tyrosine blocks in the first quarter of the protein
2105. The mean of the tyrosine blocks in the first quarter of the protein
2106. The length of the maximum tyrosine block in the second quarter of the protein
2107. The median of the tyrosine blocks in the second quarter of the protein
2108. The mean of the tyrosine blocks in the second quarter of the protein
2109. The length of the maximum tyrosine block in the third quarter of the protein
2110. The median of the tyrosine blocks in the third quarter of the protein
2111. The mean of the tyrosine blocks in the third quarter of the protein
2112. The length of the maximum tyrosine block in the fourth quarter of the protein

- 2113. The median of the tyrosine blocks in the fourth quarter of the protein
- 2114. The mean of the tyrosine blocks in the fourth quarter of the protein
- 2115. The length of the maximum tyrosine block of the protein
- 2116. The median of the tyrosine blocks of the protein
- 2117. The mean of the tyrosine blocks of the protein
- 2118. The total number of alpha residues in the sequence
- 2119. The total number of alpha residues divided by the length of the protein
- 2120. The total number of alpha residues in the first quarter of the sequence
- 2121. The total number of alpha residues in the second quarter of the sequence
- 2122. The total number of alpha residues in the third quarter of the sequence
- 2123. The total number of alpha residues in the fourth quarter of the sequence
- 2124. The total number of alpha residues in the first quarter of the sequence divided by the length of the protein
- 2125. The total number of alpha residues in the second quarter of the sequence divided by the length of the protein
- 2126. The total number of alpha residues in the third quarter of the sequence divided by the length of the protein
- 2127. The total number of alpha residues in the fourth quarter of the sequence divided by the length of the protein
- 2128. The total number of alpha residues in the first quarter of the sequence divided by the total number of alpha blocks
- 2129. The total number of alpha residues in the first quarter of the sequence divided by the total number of alpha blocks
- 2130. The total number of alpha residues in the first quarter of the sequence divided by the total number of alpha blocks
- 2131. The total number of alpha residues in the first quarter of the sequence divided by the total number of alpha blocks
- 2132. The total number of alpha residues in the first half of the protein
- 2133. The total number of alpha residues in the three-quarter region of the protein
- 2134. The total number of alpha residues from position 25% to 75% of the protein
- 2135. The total number of alpha residues in the second half of the protein
- 2136. The total number of alpha residues in the first half of the protein divided by the protein length

2137. The total number of alpha residues in the three-quarter region of the protein divided by the protein length
2138. The total number of alpha residues from position 25% to 75% of the protein divided by the protein length
2139. The total number of alpha residues in the second half of the protein divided by the protein length
2140. The total number of alpha residues in the first half of the protein divided by the total number of alpha residues in the protein
2141. The total number of alpha residues in the three-quarter region of the protein divided by the total number of alpha residues in the protein
2142. The total number of alpha residues from position 25% to 75% of the protein divided by the total number of alpha residues in the protein
2143. The total number of alpha residues in the second half of the protein divided by the total number of alpha residues in the protein
2144. The total number of alpha residue blocks in the protein
2145. The total number of alpha residue blocks in the first quarter of the protein
2146. The total number of alpha residue blocks in the second quarter of the protein
2147. The total number of alpha residue blocks in the third quarter of the protein
2148. The total number of alpha residue blocks in the fourth quarter of the protein
2149. The total number of alpha residue blocks in the first quarter of the protein divided by the protein length
2150. The total number of alpha residue blocks in the second quarter of the protein divided by the protein length
2151. The total number of alpha residue blocks in the third quarter of the protein divided by the protein length
2152. The total number of alpha residue blocks in the fourth quarter of the protein divided by the protein length
2153. The total number of alpha residue blocks in the first quarter of the protein divided by the total number of alpha blocks of the protein
2154. The total number of alpha residue blocks in the second quarter of the protein divided by the total number of alpha blocks of the protein
2155. The total number of alpha residue blocks in the third quarter of the protein divided by the total number of alpha blocks of the protein
2156. The total number of alpha residue blocks in the fourth quarter of the protein divided by the total number of alpha blocks of the protein



2157. The total number of alpha residue blocks in the first half of the protein
2158. The total number of alpha residue blocks in the three-quarter region of the protein
2159. The total number of alpha residue blocks from position 25% to 75% of the protein
2160. The total number of alpha residue blocks in the second half of the protein
2161. The total number of alpha residue blocks in the first half of the protein divided by the protein length
2162. The total number of alpha residue blocks in the three-quarter region of the protein divided by the protein length
2163. The total number of alpha residue blocks from position 25% to 75% of the protein divided by the protein length
2164. The total number of alpha residue blocks in the second half of the protein divided by the protein length
2165. The total number of alpha residue blocks in the first half of the protein divided by the total number of alpha blocks of the protein
2166. The total number of alpha residue blocks in the three-quarter region of the protein divided by the total number of alpha blocks of the protein
2167. The total number of alpha residue blocks from position 25% to 75% of the protein divided by the total number of alpha blocks of the protein
2168. The total number of alpha residue blocks in the second half of the protein divided by the total number of alpha blocks of the protein
2169. The length of the maximum alpha block in the first quarter of the protein
2170. The median of the alpha blocks in the first quarter of the protein
2171. The mean of the alpha blocks in the first quarter of the protein
2172. The length of the maximum alpha block in the second quarter of the protein
2173. The median of the alpha blocks in the second quarter of the protein
2174. The mean of the alpha blocks in the second quarter of the protein
2175. The length of the maximum alpha block in the third quarter of the protein
2176. The median of the alpha blocks in the third quarter of the protein
2177. The mean of the alpha blocks in the third quarter of the protein
2178. The length of the maximum alpha block in the fourth quarter of the protein
2179. The median of the alpha blocks in the fourth quarter of the protein
2180. The mean of the alpha blocks in the fourth quarter of the protein

2181. The length of the maximum alpha block of the protein
2182. The median of the alpha blocks of the protein
2183. The mean of the alpha blocks of the protein
2184. The total number of beta residues in the sequence
2185. The total number of beta residues divided by the length of the protein
2186. The total number of beta residues in the first quarter of the sequence
2187. The total number of beta residues in the second quarter of the sequence
2188. The total number of beta residues in the third quarter of the sequence
2189. The total number of beta residues in the fourth quarter of the sequence
2190. The total number of beta residues in the first quarter of the sequence divided by the length of the protein
2191. The total number of beta residues in the second quarter of the sequence divided by the length of the protein
2192. The total number of beta residues in the third quarter of the sequence divided by the length of the protein
2193. The total number of beta residues in the fourth quarter of the sequence divided by the length of the protein
2194. The total number of beta residues in the first quarter of the sequence divided by the total number of beta blocks
2195. The total number of beta residues in the first quarter of the sequence divided by the total number of beta blocks
2196. The total number of beta residues in the first quarter of the sequence divided by the total number of beta blocks
2197. The total number of beta residues in the first quarter of the sequence divided by the total number of beta blocks
2198. The total number of beta residues in the first half of the protein
2199. The total number of beta residues in the three-quarter region of the protein
2200. The total number of beta residues from position 25% to 75% of the protein
2201. The total number of beta residues in the second half of the protein
2202. The total number of beta residues in the first half of the protein divided by the protein length
2203. The total number of beta residues in the three-quarter region of the protein divided by the protein length
2204. The total number of beta residues from position 25% to 75% of the protein divided by the protein length

2205. The total number of beta residues in the second half of the protein divided by the protein length
2206. The total number of beta residues in the first half of the protein divided by the total number of beta residues in the protein
2207. The total number of beta residues in the three-quarter region of the protein divided by the total number of beta residues in the protein
2208. The total number of beta residues from position 25% to 75% of the protein divided by the total number of beta residues in the protein
2209. The total number of beta residues in the second half of the protein divided by the total number of beta residues in the protein
2210. The total number of beta residue blocks in the protein
2211. The total number of beta residue blocks in the first quarter of the protein
2212. The total number of beta residue blocks in the second quarter of the protein
2213. The total number of beta residue blocks in the third quarter of the protein
2214. The total number of beta residue blocks in the fourth quarter of the protein
2215. The total number of beta residue blocks in the first quarter of the protein divided by the protein length
2216. The total number of beta residue blocks in the second quarter of the protein divided by the protein length
2217. The total number of beta residue blocks in the third quarter of the protein divided by the protein length
2218. The total number of beta residue blocks in the fourth quarter of the protein divided by the protein length
2219. The total number of beta residue blocks in the first quarter of the protein divided by the total number of beta blocks of the protein
2220. The total number of beta residue blocks in the second quarter of the protein divided by the total number of beta blocks of the protein
2221. The total number of beta residue blocks in the third quarter of the protein divided by the total number of beta blocks of the protein
2222. The total number of beta residue blocks in the fourth quarter of the protein divided by the total number of beta blocks of the protein
2223. The total number of beta residue blocks in the first half of the protein
2224. The total number of beta residue blocks in the three-quarter region of the protein
2225. The total number of beta residue blocks from position 25% to 75% of the protein

- 2226. The total number of beta residue blocks in the second half of the protein
- 2227. The total number of beta residue blocks in the first half of the protein divided by the protein length
- 2228. The total number of beta residue blocks in the three-quarter region of the protein divided by the protein length
- 2229. The total number of beta residue blocks from position 25% to 75% of the protein divided by the protein length
- 2230. The total number of beta residue blocks in the second half of the protein divided by the protein length
- 2231. The total number of beta residue blocks in the first half of the protein divided by the total number of beta blocks of the protein
- 2232. The total number of beta residue blocks in the three-quarter region of the protein divided by the total number of beta blocks of the protein
- 2233. The total number of beta residue blocks from position 25% to 75% of the protein divided by the total number of beta blocks of the protein
- 2234. The total number of beta residue blocks in the second half of the protein divided by the total number of beta blocks of the protein
- 2235. The length of the maximum beta block in the first quarter of the protein
- 2236. The median of the beta blocks in the first quarter of the protein
- 2237. The mean of the beta blocks in the first quarter of the protein
- 2238. The length of the maximum beta block in the second quarter of the protein
- 2239. The median of the beta blocks in the second quarter of the protein
- 2240. The mean of the beta blocks in the second quarter of the protein
- 2241. The length of the maximum beta block in the third quarter of the protein
- 2242. The median of the beta blocks in the third quarter of the protein
- 2243. The mean of the beta blocks in the third quarter of the protein
- 2244. The length of the maximum beta block in the fourth quarter of the protein
- 2245. The median of the beta blocks in the fourth quarter of the protein
- 2246. The mean of the beta blocks in the fourth quarter of the protein
- 2247. The length of the maximum beta block of the protein
- 2248. The median of the beta blocks of the protein
- 2249. The mean of the beta blocks of the protein
- 2250. The total number of coil residues in the sequence
- 2251. The total number of coil residues divided by the length of the protein

- 2252. The total number of coil residues in the first quarter of the sequence
- 2253. The total number of coil residues in the second quarter of the sequence
- 2254. The total number of coil residues in the third quarter of the sequence
- 2255. The total number of coil residues in the fourth quarter of the sequence
- 2256. The total number of coil residues in the first quarter of the sequence divided by the length of the protein
- 2257. The total number of coil residues in the second quarter of the sequence divided by the length of the protein
- 2258. The total number of coil residues in the third quarter of the sequence divided by the length of the protein
- 2259. The total number of coil residues in the fourth quarter of the sequence divided by the length of the protein
- 2260. The total number of coil residues in the first quarter of the sequence divided by the total number of coil blocks
- 2261. The total number of coil residues in the first quarter of the sequence divided by the total number of coil blocks
- 2262. The total number of coil residues in the first quarter of the sequence divided by the total number of coil blocks
- 2263. The total number of coil residues in the first quarter of the sequence divided by the total number of coil blocks
- 2264. The total number of coil residues in the first half of the protein
- 2265. The total number of coil residues in the three-quarter region of the protein
- 2266. The total number of coil residues from position 25% to 75% of the protein
- 2267. The total number of coil residues in the second half of the protein
- 2268. The total number of coil residues in the first half of the protein divided by the protein length
- 2269. The total number of coil residues in the three-quarter region of the protein divided by the protein length
- 2270. The total number of coil residues from position 25% to 75% of the protein divided by the protein length
- 2271. The total number of coil residues in the second half of the protein divided by the protein length
- 2272. The total number of coil residues in the first half of the protein divided by the total number of coil residues in the protein
- 2273. The total number of coil residues in the three-quarter region of the protein divided by the total number of coil residues in the protein

2274. The total number of coil residues from position 25% to 75% of the protein divided by the total number of coil residues in the protein
2275. The total number of coil residues in the second half of the protein divided by the total number of coil residues in the protein
2276. The total number of coil residue blocks in the protein
2277. The total number of coil residue blocks in the first quarter of the protein
2278. The total number of coil residue blocks in the second quarter of the protein
2279. The total number of coil residue blocks in the third quarter of the protein
2280. The total number of coil residue blocks in the fourth quarter of the protein
2281. The total number of coil residue blocks in the first quarter of the protein divided by the protein length
2282. The total number of coil residue blocks in the second quarter of the protein divided by the protein length
2283. The total number of coil residue blocks in the third quarter of the protein divided by the protein length
2284. The total number of coil residue blocks in the fourth quarter of the protein divided by the protein length
2285. The total number of coil residue blocks in the first quarter of the protein divided by the total number of coil blocks of the protein
2286. The total number of coil residue blocks in the second quarter of the protein divided by the total number of coil blocks of the protein
2287. The total number of coil residue blocks in the third quarter of the protein divided by the total number of coil blocks of the protein
2288. The total number of coil residue blocks in the fourth quarter of the protein divided by the total number of coil blocks of the protein
2289. The total number of coil residue blocks in the first half of the protein
2290. The total number of coil residue blocks in the three-quarter region of the protein
2291. The total number of coil residue blocks from position 25% to 75% of the protein
2292. The total number of coil residue blocks in the second half of the protein
2293. The total number of coil residue blocks in the first half of the protein divided by the protein length
2294. The total number of coil residue blocks in the three-quarter region of the protein divided by the protein length
2295. The total number of coil residue blocks from position 25% to 75% of the protein divided by the protein length

2296. The total number of coil residue blocks in the second half of the protein divided by the protein length
2297. The total number of coil residue blocks in the first half of the protein divided by the total number of coil blocks of the protein
2298. The total number of coil residue blocks in the three-quarter region of the protein divided by the total number of coil blocks of the protein
2299. The total number of coil residue blocks from position 25% to 75% of the protein divided by the total number of coil blocks of the protein
2300. The total number of coil residue blocks in the second half of the protein divided by the total number of coil blocks of the protein
2301. The length of the maximum coil block in the first quarter of the protein
2302. The median of the coil blocks in the first quarter of the protein
2303. The mean of the coil blocks in the first quarter of the protein
2304. The length of the maximum coil block in the second quarter of the protein
2305. The median of the coil blocks in the second quarter of the protein
2306. The mean of the coil blocks in the second quarter of the protein
2307. The length of the maximum coil block in the third quarter of the protein
2308. The median of the coil blocks in the third quarter of the protein
2309. The mean of the coil blocks in the third quarter of the protein
2310. The length of the maximum coil block in the fourth quarter of the protein
2311. The median of the coil blocks in the fourth quarter of the protein
2312. The mean of the coil blocks in the fourth quarter of the protein
2313. The length of the maximum coil block of the protein
2314. The median of the coil blocks of the protein
2315. The mean of the coil blocks of the protein
2316. The total number of transmembrane helices residues in the sequence
2317. The total number of transmembrane helices residues divided by the length of the protein
2318. The total number of transmembrane helices residues in the first quarter of the sequence
2319. The total number of transmembrane helices residues in the second quarter of the sequence
2320. The total number of transmembrane helices residues in the third quarter of the sequence

2321. The total number of transmembrane helices residues in the fourth quarter of the sequence
2322. The total number of transmembrane helices residues in the first quarter of the sequence divided by the length of the protein
2323. The total number of transmembrane helices residues in the second quarter of the sequence divided by the length of the protein
2324. The total number of transmembrane helices residues in the third quarter of the sequence divided by the length of the protein
2325. The total number of transmembrane helices residues in the fourth quarter of the sequence divided by the length of the protein
2326. The total number of transmembrane helices residues in the first quarter of the sequence divided by the total number of transmembrane helices blocks
2327. The total number of transmembrane helices residues in the first quarter of the sequence divided by the total number of transmembrane helices blocks
2328. The total number of transmembrane helices residues in the first quarter of the sequence divided by the total number of transmembrane helices blocks
2329. The total number of transmembrane helices residues in the first quarter of the sequence divided by the total number of transmembrane helices blocks
2330. The total number of transmembrane helices residues in the first half of the protein
2331. The total number of transmembrane helices residues in the three-quarter region of the protein
2332. The total number of transmembrane helices residues from position 25% to 75% of the protein
2333. The total number of transmembrane helices residues in the second half of the protein
2334. The total number of transmembrane helices residues in the first half of the protein divided by the protein length
2335. The total number of transmembrane helices residues in the three-quarter region of the protein divided by the protein length
2336. The total number of transmembrane helices residues from position 25% to 75% of the protein divided by the protein length
2337. The total number of transmembrane helices residues in the second half of the protein divided by the protein length
2338. The total number of transmembrane helices residues in the first half of the protein divided by the total number of transmembrane helices residues in the protein



2339. The total number of transmembrane helices residues in the three-quarter region of the protein divided by the total number of transmembrane helices residues in the protein
2340. The total number of transmembrane helices residues from position 25% to 75% of the protein divided by the total number of transmembrane helices residues in the protein
2341. The total number of transmembrane helices residues in the second half of the protein divided by the total number of transmembrane helices residues in the protein
2342. The total number of transmembrane helices residue blocks in the protein
2343. The total number of transmembrane helices residue blocks in the first quarter of the protein
2344. The total number of transmembrane helices residue blocks in the second quarter of the protein
2345. The total number of transmembrane helices residue blocks in the third quarter of the protein
2346. The total number of transmembrane helices residue blocks in the fourth quarter of the protein
2347. The total number of transmembrane helices residue blocks in the first quarter of the protein divided by the protein length
2348. The total number of transmembrane helices residue blocks in the second quarter of the protein divided by the protein length
2349. The total number of transmembrane helices residue blocks in the third quarter of the protein divided by the protein length
2350. The total number of transmembrane helices residue blocks in the fourth quarter of the protein divided by the protein length
2351. The total number of transmembrane helices residue blocks in the first quarter of the protein divided by the total number of transmembrane helices blocks of the protein
2352. The total number of transmembrane helices residue blocks in the second quarter of the protein divided by the total number of transmembrane helices blocks of the protein
2353. The total number of transmembrane helices residue blocks in the third quarter of the protein divided by the total number of transmembrane helices blocks of the protein
2354. The total number of transmembrane helices residue blocks in the fourth quarter of the protein divided by the total number of transmembrane helices blocks of the protein
2355. The total number of transmembrane helices residue blocks in the first half of the protein

2356. The total number of transmembrane helices residue blocks in the three-quarter region of the protein
2357. The total number of transmembrane helices residue blocks from position 25% to 75% of the protein
2358. The total number of transmembrane helices residue blocks in the second half of the protein
2359. The total number of transmembrane helices residue blocks in the first half of the protein divided by the protein length
2360. The total number of transmembrane helices residue blocks in the three-quarter region of the protein divided by the protein length
2361. The total number of transmembrane helices residue blocks from position 25% to 75% of the protein divided by the protein length
2362. The total number of transmembrane helices residue blocks in the second half of the protein divided by the protein length
2363. The total number of transmembrane helices residue blocks in the first half of the protein divided by the total number of transmembrane helices blocks of the protein
2364. The total number of transmembrane helices residue blocks in the three-quarter region of the protein divided by the total number of transmembrane helices blocks of the protein
2365. The total number of transmembrane helices residue blocks from position 25% to 75% of the protein divided by the total number of transmembrane helices blocks of the protein
2366. The total number of transmembrane helices residue blocks in the second half of the protein divided by the total number of transmembrane helices blocks of the protein
2367. The length of the maximum transmembrane helices block in the first quarter of the protein
2368. The median of the transmembrane helices blocks in the first quarter of the protein
2369. The mean of the transmembrane helices blocks in the first quarter of the protein
2370. The length of the maximum transmembrane helices block in the second quarter of the protein
2371. The median of the transmembrane helices blocks in the second quarter of the protein
2372. The mean of the transmembrane helices blocks in the second quarter of the protein

- 2373. The length of the maximum transmembrane helices block in the third quarter of the protein
- 2374. The median of the transmembrane helices blocks in the third quarter of the protein
- 2375. The mean of the transmembrane helices blocks in the third quarter of the protein
- 2376. The length of the maximum transmembrane helices block in the fourth quarter of the protein
- 2377. The median of the transmembrane helices blocks in the fourth quarter of the protein
- 2378. The mean of the transmembrane helices blocks in the fourth quarter of the protein
- 2379. The length of the maximum transmembrane helices block of the protein
- 2380. The median of the transmembrane helices blocks of the protein
- 2381. The mean of the transmembrane helices blocks of the protein
- 2382. The total number of disordered loops or coil residues in the sequence
- 2383. The total number of disordered loops or coil residues divided by the length of the protein
- 2384. The total number of disordered loops or coil residues in the first quarter of the sequence
- 2385. The total number of disordered loops or coil residues in the second quarter of the sequence
- 2386. The total number of disordered loops or coil residues in the third quarter of the sequence
- 2387. The total number of disordered loops or coil residues in the fourth quarter of the sequence
- 2388. The total number of disordered loops or coil residues in the first quarter of the sequence divided by the length of the protein
- 2389. The total number of disordered loops or coil residues in the second quarter of the sequence divided by the length of the protein
- 2390. The total number of disordered loops or coil residues in the third quarter of the sequence divided by the length of the protein
- 2391. The total number of disordered loops or coil residues in the fourth quarter of the sequence divided by the length of the protein
- 2392. The total number of disordered loops or coil residues in the first quarter of the sequence divided by the total number of disordered loops or coil blocks

2393. The total number of disordered loops or coil residues in the first quarter of the sequence divided by the total number of disordered loops or coil blocks
2394. The total number of disordered loops or coil residues in the first quarter of the sequence divided by the total number of disordered loops or coil blocks
2395. The total number of disordered loops or coil residues in the first quarter of the sequence divided by the total number of disordered loops or coil blocks
2396. The total number of disordered loops or coil residues in the first half of the protein
2397. The total number of disordered loops or coil residues in the three-quarter region of the protein
2398. The total number of disordered loops or coil residues from position 25% to 75% of the protein
2399. The total number of disordered loops or coil residues in the second half of the protein
2400. The total number of disordered loops or coil residues in the first half of the protein divided by the protein length
2401. The total number of disordered loops or coil residues in the three-quarter region of the protein divided by the protein length
2402. The total number of disordered loops or coil residues from position 25% to 75% of the protein divided by the protein length
2403. The total number of disordered loops or coil residues in the second half of the protein divided by the protein length
2404. The total number of disordered loops or coil residues in the first half of the protein divided by the total number of disordered loops or coil residues in the protein
2405. The total number of disordered loops or coil residues in the three-quarter region of the protein divided by the total number of disordered loops or coil residues in the protein
2406. The total number of disordered loops or coil residues from position 25% to 75% of the protein divided by the total number of disordered loops or coil residues in the protein
2407. The total number of disordered loops or coil residues in the second half of the protein divided by the total number of disordered loops or coil residues in the protein
2408. The total number of disordered loops or coil residue blocks in the protein
2409. The total number of disordered loops or coil residue blocks in the first quarter of the protein

- 2410. The total number of disordered loops or coil residue blocks in the second quarter of the protein
- 2411. The total number of disordered loops or coil residue blocks in the third quarter of the protein
- 2412. The total number of disordered loops or coil residue blocks in the fourth quarter of the protein
- 2413. The total number of disordered loops or coil residue blocks in the first quarter of the protein divided by the protein length
- 2414. The total number of disordered loops or coil residue blocks in the second quarter of the protein divided by the protein length
- 2415. The total number of disordered loops or coil residue blocks in the third quarter of the protein divided by the protein length
- 2416. The total number of disordered loops or coil residue blocks in the fourth quarter of the protein divided by the protein length
- 2417. The total number of disordered loops or coil residue blocks in the first quarter of the protein divided by the total number of disordered loops or coil blocks of the protein
- 2418. The total number of disordered loops or coil residue blocks in the second quarter of the protein divided by the total number of disordered loops or coil blocks of the protein
- 2419. The total number of disordered loops or coil residue blocks in the third quarter of the protein divided by the total number of disordered loops or coil blocks of the protein
- 2420. The total number of disordered loops or coil residue blocks in the fourth quarter of the protein divided by the total number of disordered loops or coil blocks of the protein
- 2421. The total number of disordered loops or coil residue blocks in the first half of the protein
- 2422. The total number of disordered loops or coil residue blocks in the three-quarter region of the protein
- 2423. The total number of disordered loops or coil residue blocks from position 25% to 75% of the protein
- 2424. The total number of disordered loops or coil residue blocks in the second half of the protein
- 2425. The total number of disordered loops or coil residue blocks in the first half of the protein divided by the protein length
- 2426. The total number of disordered loops or coil residue blocks in the three-quarter region of the protein divided by the protein length

2427. The total number of disordered loops or coil residue blocks from position 25% to 75% of the protein divided by the protein length
2428. The total number of disordered loops or coil residue blocks in the second half of the protein divided by the protein length
2429. The total number of disordered loops or coil residue blocks in the first half of the protein divided by the total number of disordered loops or coil blocks of the protein
2430. The total number of disordered loops or coil residue blocks in the three-quarter region of the protein divided by the total number of disordered loops or coil blocks of the protein
2431. The total number of disordered loops or coil residue blocks from position 25% to 75% of the protein divided by the total number of disordered loops or coil blocks of the protein
2432. The total number of disordered loops or coil residue blocks in the second half of the protein divided by the total number of disordered loops or coil blocks of the protein
2433. The length of the maximum disordered loops or coil block in the first quarter of the protein
2434. The median of the disordered loops or coil blocks in the first quarter of the protein
2435. The mean of the disordered loops or coil blocks in the first quarter of the protein
2436. The length of the maximum disordered loops or coil block in the second quarter of the protein
2437. The median of the disordered loops or coil blocks in the second quarter of the protein
2438. The mean of the disordered loops or coil blocks in the second quarter of the protein
2439. The length of the maximum disordered loops or coil block in the third quarter of the protein
2440. The median of the disordered loops or coil blocks in the third quarter of the protein
2441. The mean of the disordered loops or coil blocks in the third quarter of the protein
2442. The length of the maximum disordered loops or coil block in the fourth quarter of the protein
2443. The median of the disordered loops or coil blocks in the fourth quarter of the protein

- 2444. The mean of the disordered loops or coil blocks in the fourth quarter of the protein
- 2445. The length of the maximum disordered loops or coil block of the protein
- 2446. The median of the disordered loops or coil blocks of the protein
- 2447. The mean of the disordered loops or coil blocks of the protein
- 2448. The total number of disordered hot loops residues in the sequence
- 2449. The total number of disordered hot loops residues divided by the length of the protein
- 2450. The total number of disordered hot loops residues in the first quarter of the sequence
- 2451. The total number of disordered hot loops residues in the second quarter of the sequence
- 2452. The total number of disordered hot loops residues in the third quarter of the sequence
- 2453. The total number of disordered hot loops residues in the fourth quarter of the sequence
- 2454. The total number of disordered hot loops residues in the first quarter of the sequence divided by the length of the protein
- 2455. The total number of disordered hot loops residues in the second quarter of the sequence divided by the length of the protein
- 2456. The total number of disordered hot loops residues in the third quarter of the sequence divided by the length of the protein
- 2457. The total number of disordered hot loops residues in the fourth quarter of the sequence divided by the length of the protein
- 2458. The total number of disordered hot loops residues in the first quarter of the sequence divided by the total number of disordered hot loops blocks
- 2459. The total number of disordered hot loops residues in the first quarter of the sequence divided by the total number of disordered hot loops blocks
- 2460. The total number of disordered hot loops residues in the first quarter of the sequence divided by the total number of disordered hot loops blocks
- 2461. The total number of disordered hot loops residues in the first quarter of the sequence divided by the total number of disordered hot loops blocks
- 2462. The total number of disordered hot loops residues in the first half of the protein
- 2463. The total number of disordered hot loops residues in the three-quarter region of the protein

2464. The total number of disordered hot loops residues from position 25% to 75% of the protein
2465. The total number of disordered hot loops residues in the second half of the protein
2466. The total number of disordered hot loops residues in the first half of the protein divided by the protein length
2467. The total number of disordered hot loops residues in the three-quarter region of the protein divided by the protein length
2468. The total number of disordered hot loops residues from position 25% to 75% of the protein divided by the protein length
2469. The total number of disordered hot loops residues in the second half of the protein divided by the protein length
2470. The total number of disordered hot loops residues in the first half of the protein divided by the total number of disordered hot loops residues in the protein
2471. The total number of disordered hot loops residues in the three-quarter region of the protein divided by the total number of disordered hot loops residues in the protein
2472. The total number of disordered hot loops residues from position 25% to 75% of the protein divided by the total number of disordered hot loops residues in the protein
2473. The total number of disordered hot loops residues in the second half of the protein divided by the total number of disordered hot loops residues in the protein
2474. The total number of disordered hot loops residue blocks in the protein
2475. The total number of disordered hot loops residue blocks in the first quarter of the protein
2476. The total number of disordered hot loops residue blocks in the second quarter of the protein
2477. The total number of disordered hot loops residue blocks in the third quarter of the protein
2478. The total number of disordered hot loops residue blocks in the fourth quarter of the protein
2479. The total number of disordered hot loops residue blocks in the first quarter of the protein divided by the protein length
2480. The total number of disordered hot loops residue blocks in the second quarter of the protein divided by the protein length
2481. The total number of disordered hot loops residue blocks in the third quarter of the protein divided by the protein length



2482. The total number of disordered hot loops residue blocks in the fourth quarter of the protein divided by the protein length
2483. The total number of disordered hot loops residue blocks in the first quarter of the protein divided by the total number of disordered hot loops blocks of the protein
2484. The total number of disordered hot loops residue blocks in the second quarter of the protein divided by the total number of disordered hot loops blocks of the protein
2485. The total number of disordered hot loops residue blocks in the third quarter of the protein divided by the total number of disordered hot loops blocks of the protein
2486. The total number of disordered hot loops residue blocks in the fourth quarter of the protein divided by the total number of disordered hot loops blocks of the protein
2487. The total number of disordered hot loops residue blocks in the first half of the protein
2488. The total number of disordered hot loops residue blocks in the three-quarter region of the protein
2489. The total number of disordered hot loops residue blocks from position 25% to 75% of the protein
2490. The total number of disordered hot loops residue blocks in the second half of the protein
2491. The total number of disordered hot loops residue blocks in the first half of the protein divided by the protein length
2492. The total number of disordered hot loops residue blocks in the three-quarter region of the protein divided by the protein length
2493. The total number of disordered hot loops residue blocks from position 25% to 75% of the protein divided by the protein length
2494. The total number of disordered hot loops residue blocks in the second half of the protein divided by the protein length
2495. The total number of disordered hot loops residue blocks in the first half of the protein divided by the total number of disordered hot loops blocks of the protein
2496. The total number of disordered hot loops residue blocks in the three-quarter region of the protein divided by the total number of disordered hot loops blocks of the protein
2497. The total number of disordered hot loops residue blocks from position 25% to 75% of the protein divided by the total number of disordered hot loops blocks of the protein

2498. The total number of disordered hot loops residue blocks in the second half of the protein divided by the total number of disordered hot loops blocks of the protein
2499. The length of the maximum disordered hot loops block in the first quarter of the protein
2500. The median of the disordered hot loops blocks in the first quarter of the protein
2501. The mean of the disordered hot loops blocks in the first quarter of the protein
2502. The length of the maximum disordered hot loops block in the second quarter of the protein
2503. The median of the disordered hot loops blocks in the second quarter of the protein
2504. The mean of the disordered hot loops blocks in the second quarter of the protein
2505. The length of the maximum disordered hot loops block in the third quarter of the protein
2506. The median of the disordered hot loops blocks in the third quarter of the protein
2507. The mean of the disordered hot loops blocks in the third quarter of the protein
2508. The length of the maximum disordered hot loops block in the fourth quarter of the protein
2509. The median of the disordered hot loops blocks in the fourth quarter of the protein
2510. The mean of the disordered hot loops blocks in the fourth quarter of the protein
2511. The length of the maximum disordered hot loops block of the protein
2512. The median of the disordered hot loops blocks of the protein
2513. The mean of the disordered hot loops blocks of the protein
2514. The total number of disordered (missing coordinates in X-Ray structure) residues in the sequence
2515. The total number of disordered (missing coordinates in X-Ray structure) residues divided by the length of the protein
2516. The total number of disordered (missing coordinates in X-Ray structure) residues in the first quarter of the sequence
2517. The total number of disordered (missing coordinates in X-Ray structure) residues in the second quarter of the sequence

2518. The total number of disordered (missing coordinates in X-Ray structure) residues in the third quarter of the sequence
2519. The total number of disordered (missing coordinates in X-Ray structure) residues in the fourth quarter of the sequence
2520. The total number of disordered (missing coordinates in X-Ray structure) residues in the first quarter of the sequence divided by the length of the protein
2521. The total number of disordered (missing coordinates in X-Ray structure) residues in the second quarter of the sequence divided by the length of the protein
2522. The total number of disordered (missing coordinates in X-Ray structure) residues in the third quarter of the sequence divided by the length of the protein
2523. The total number of disordered (missing coordinates in X-Ray structure) residues in the fourth quarter of the sequence divided by the length of the protein
2524. The total number of disordered (missing coordinates in X-Ray structure) residues in the first quarter of the sequence divided by the total number of disordered (missing coordinates in X-Ray structure) blocks
2525. The total number of disordered (missing coordinates in X-Ray structure) residues in the first quarter of the sequence divided by the total number of disordered (missing coordinates in X-Ray structure) blocks
2526. The total number of disordered (missing coordinates in X-Ray structure) residues in the first quarter of the sequence divided by the total number of disordered (missing coordinates in X-Ray structure) blocks
2527. The total number of disordered (missing coordinates in X-Ray structure) residues in the first quarter of the sequence divided by the total number of disordered (missing coordinates in X-Ray structure) blocks
2528. The total number of disordered (missing coordinates in X-Ray structure) residues in the first half of the protein
2529. The total number of disordered (missing coordinates in X-Ray structure) residues in the three-quarter region of the protein
2530. The total number of disordered (missing coordinates in X-Ray structure) residues from position 25% to 75% of the protein
2531. The total number of disordered (missing coordinates in X-Ray structure) residues in the second half of the protein
2532. The total number of disordered (missing coordinates in X-Ray structure) residues in the first half of the protein divided by the protein length
2533. The total number of disordered (missing coordinates in X-Ray structure) residues in the three-quarter region of the protein divided by the protein length

2534. The total number of disordered (missing coordinates in X-Ray structure) residues from position 25% to 75% of the protein divided by the protein length
2535. The total number of disordered (missing coordinates in X-Ray structure) residues in the second half of the protein divided by the protein length
2536. The total number of disordered (missing coordinates in X-Ray structure) residues in the first half of the protein divided by the total number of disordered (missing coordinates in X-Ray structure) residues in the protein
2537. The total number of disordered (missing coordinates in X-Ray structure) residues in the three-quarter region of the protein divided by the total number of disordered (missing coordinates in X-Ray structure) residues in the protein
2538. The total number of disordered (missing coordinates in X-Ray structure) residues from position 25% to 75% of the protein divided by the total number of disordered (missing coordinates in X-Ray structure) residues in the protein
2539. The total number of disordered (missing coordinates in X-Ray structure) residues in the second half of the protein divided by the total number of disordered (missing coordinates in X-Ray structure) residues in the protein
2540. The total number of disordered (missing coordinates in X-Ray structure) residue blocks in the protein
2541. The total number of disordered (missing coordinates in X-Ray structure) residue blocks in the first quarter of the protein
2542. The total number of disordered (missing coordinates in X-Ray structure) residue blocks in the second quarter of the protein
2543. The total number of disordered (missing coordinates in X-Ray structure) residue blocks in the third quarter of the protein
2544. The total number of disordered (missing coordinates in X-Ray structure) residue blocks in the fourth quarter of the protein
2545. The total number of disordered (missing coordinates in X-Ray structure) residue blocks in the first quarter of the protein divided by the protein length
2546. The total number of disordered (missing coordinates in X-Ray structure) residue blocks in the second quarter of the protein divided by the protein length
2547. The total number of disordered (missing coordinates in X-Ray structure) residue blocks in the third quarter of the protein divided by the protein length
2548. The total number of disordered (missing coordinates in X-Ray structure) residue blocks in the fourth quarter of the protein divided by the protein length

2549. The total number of disordered (missing coordinates in X-Ray structure) residue blocks in the first quarter of the protein divided by the total number of disordered (missing coordinates in X-Ray structure) blocks of the protein
2550. The total number of disordered (missing coordinates in X-Ray structure) residue blocks in the second quarter of the protein divided by the total number of disordered (missing coordinates in X-Ray structure) blocks of the protein
2551. The total number of disordered (missing coordinates in X-Ray structure) residue blocks in the third quarter of the protein divided by the total number of disordered (missing coordinates in X-Ray structure) blocks of the protein
2552. The total number of disordered (missing coordinates in X-Ray structure) residue blocks in the fourth quarter of the protein divided by the total number of disordered (missing coordinates in X-Ray structure) blocks of the protein
2553. The total number of disordered (missing coordinates in X-Ray structure) residue blocks in the first half of the protein
2554. The total number of disordered (missing coordinates in X-Ray structure) residue blocks in the three-quarter region of the protein
2555. The total number of disordered (missing coordinates in X-Ray structure) residue blocks from position 25% to 75% of the protein
2556. The total number of disordered (missing coordinates in X-Ray structure) residue blocks in the second half of the protein
2557. The total number of disordered (missing coordinates in X-Ray structure) residue blocks in the first half of the protein divided by the protein length
2558. The total number of disordered (missing coordinates in X-Ray structure) residue blocks in the three-quarter region of the protein divided by the protein length
2559. The total number of disordered (missing coordinates in X-Ray structure) residue blocks from position 25% to 75% of the protein divided by the protein length
2560. The total number of disordered (missing coordinates in X-Ray structure) residue blocks in the second half of the protein divided by the protein length
2561. The total number of disordered (missing coordinates in X-Ray structure) residue blocks in the first half of the protein divided by the total number of disordered (missing coordinates in X-Ray structure) blocks of the protein
2562. The total number of disordered (missing coordinates in X-Ray structure) residue blocks in the three-quarter region of the protein divided by the total number of disordered (missing coordinates in X-Ray structure) blocks of the protein

2563. The total number of disordered (missing coordinates in X-Ray structure) residue blocks from position 25% to 75% of the protein divided by the total number of disordered (missing coordinates in X-Ray structure) blocks of the protein
2564. The total number of disordered (missing coordinates in X-Ray structure) residue blocks in the second half of the protein divided by the total number of disordered (missing coordinates in X-Ray structure) blocks of the protein
2565. The length of the maximum disordered (missing coordinates in X-Ray structure) block in the first quarter of the protein
2566. The median of the disordered (missing coordinates in X-Ray structure) blocks in the first quarter of the protein
2567. The mean of the disordered (missing coordinates in X-Ray structure) blocks in the first quarter of the protein
2568. The length of the maximum disordered (missing coordinates in X-Ray structure) block in the second quarter of the protein
2569. The median of the disordered (missing coordinates in X-Ray structure) blocks in the second quarter of the protein
2570. The mean of the disordered (missing coordinates in X-Ray structure) blocks in the second quarter of the protein
2571. The length of the maximum disordered (missing coordinates in X-Ray structure) block in the third quarter of the protein
2572. The median of the disordered (missing coordinates in X-Ray structure) blocks in the third quarter of the protein
2573. The mean of the disordered (missing coordinates in X-Ray structure) blocks in the third quarter of the protein
2574. The length of the maximum disordered (missing coordinates in X-Ray structure) block in the fourth quarter of the protein
2575. The median of the disordered (missing coordinates in X-Ray structure) blocks in the fourth quarter of the protein
2576. The mean of the disordered (missing coordinates in X-Ray structure) blocks in the fourth quarter of the protein
2577. The length of the maximum disordered (missing coordinates in X-Ray structure) block of the protein
2578. The median of the disordered (missing coordinates in X-Ray structure) blocks of the protein
2579. The mean of the disordered (missing coordinates in X-Ray structure) blocks of the protein
